# Supplementary material
Source: publisher site journal article supplement (https://www.spandidos-publications.com/8374/downloadSupplementary)
Supplement: Supplementary file 1 [file downloadSupplementary]

## Sheet: Sheet1
Table SIV. 3,763 genes associated with HP
Query	Pearson correlation	P-value	False discovery rate- Benjamini-Hochberg	Event_SD	Event_TD
A2M	0.392699	6.3928e-20	4.50928e-18	498	501
AAAS	-0.175676	7.71384e-05	0.0004654	498	501
AADAC	0.191894	1.52743e-05	0.00011339	498	496
AARS2	-0.193471	1.29523e-05	9.85914e-05	498	501
AARSD1	-0.168825	0.00014666	0.00080955	498	501
AASS	0.326889	6.11186e-14	2.4672e-12	498	501
AATF	-0.220082	6.52743e-07	7.23778e-06	498	501
AATK	0.217182	9.21255e-07	9.84152e-06	498	501
ABCA17P	-0.190087	1.84214e-05	0.000133354	498	482
ABCA3	0.524825	8.29309e-37	1.65065e-34	498	501
ABCA6	0.275143	3.74101e-10	8.56555e-09	498	501
ABCA8	0.386332	2.79341e-19	1.88443e-17	498	492
ABCC13	0.170398	0.000126819	0.000715933	498	308
ABCC6P1	0.518883	7.03356e-36	1.28542e-33	498	435
ABCC6P2	0.396589	2.55498e-20	1.85425e-18	498	500
ABCC6	0.569274	2.2675e-44	6.24434e-42	498	501
ABCC9	0.365686	2.68559e-17	1.54695e-15	498	501
ABCD2	0.185148	3.04689e-05	0.000206938	498	497
ABCD3	0.287847	5.15927e-11	1.3683e-09	498	501
ABI3BP	0.281601	1.38376e-10	3.38827e-09	498	501
ABI3	0.245766	2.50463e-08	3.92751e-07	498	501
ABLIM3	0.30666	2.27344e-12	7.26597e-11	498	501
ACAA1	0.268899	9.55033e-10	2.02308e-08	498	501
ACADL	0.423021	3.61457e-23	3.2295e-21	498	485
ACADSB	0.207431	2.83578e-06	2.66765e-05	498	501
ACAN	-0.234458	1.10264e-07	1.49773e-06	498	501
ACAP1	0.181113	4.55215e-05	0.000291068	498	501
ACBD6	-0.228824	2.24462e-07	2.7923e-06	498	501
ACCN3	-0.196418	9.48221e-06	7.53242e-05	498	496
ACD	-0.179349	5.41111e-05	0.000338836	498	501
ACE	0.264822	1.73853e-09	3.48104e-08	498	501
ACLY	-0.190164	1.82762e-05	0.000132598	498	501
ACOX2	0.4634	4.89216e-28	5.96042e-26	498	500
ACOX3	0.201561	5.44093e-06	4.66634e-05	498	501
ACOXL	0.414509	3.18776e-22	2.63718e-20	498	494
ACP2	0.188945	2.07177e-05	0.000147429	498	501
ACP5	0.299122	8.16339e-12	2.43485e-10	498	501
ACPL2	-0.248946	1.62907e-08	2.6647e-07	498	501
ACSF2	0.172242	0.000106775	0.000615923	498	501
ACSL4	0.284703	8.50367e-11	2.16666e-09	498	501
ACSL5	0.367646	1.76566e-17	1.03183e-15	498	501
ACSM3	0.458912	1.83385e-27	2.14336e-25	498	501
ACSM5	0.243827	3.24666e-08	4.92603e-07	498	461
ACSS3	0.301574	5.40802e-12	1.64474e-10	498	501
ACTA2	0.197643	8.31784e-06	6.71541e-05	498	501
ACTBL2	0.239321	5.88209e-08	8.47047e-07	498	434
ACTB	0.189932	1.87191e-05	0.000135169	498	501
ACTG2	0.170018	0.000131367	0.000737878	498	501
ACTL6A	-0.186559	2.64245e-05	0.000182798	498	501
ACTR3B	-0.192735	1.3991e-05	0.000105301	498	501
ACVR2B	-0.175241	8.04054e-05	0.00048236	498	501
ACVRL1	0.327699	5.25729e-14	2.13942e-12	498	501
ACYP1	-0.207512	2.81006e-06	2.64684e-05	498	501
ADAM11	-0.281829	1.33546e-10	3.27798e-09	498	500
ADAM28	0.269927	8.1977e-10	1.76444e-08	498	501
ADAM6	0.228695	2.28108e-07	2.82928e-06	498	501
ADAM9	0.259717	3.62867e-09	6.7669e-08	498	501
ADAMTS13	-0.179481	5.3417e-05	0.000335253	498	501
ADAMTS16	0.392079	7.39093e-20	5.15902e-18	498	495
ADAMTS20	-0.176904	6.85674e-05	0.000417954	498	455
ADAMTS8	0.334235	1.53468e-14	6.70687e-13	498	495
ADAMTS9	0.168298	0.000153928	0.000845838	498	501
ADAMTSL2	0.184357	3.29866e-05	0.000221191	498	501
ADAMTSL3	0.27401	4.4424e-10	1.00118e-08	498	501
ADAMTSL4	0.206715	3.07363e-06	2.86725e-05	498	501
ADAP2	0.236898	8.05812e-08	1.12651e-06	498	501
ADAR	-0.186684	2.60922e-05	0.000180935	498	501
ADCY4	0.172926	0.000100128	0.000583952	498	501
ADCYAP1	0.21616	1.03914e-06	1.09408e-05	498	481
ADD1	0.184865	3.13481e-05	0.000212035	498	501
ADH1A	0.305499	2.77471e-12	8.74294e-11	498	396
ADH1B	0.503486	1.47716e-33	2.31995e-31	498	490
ADH1C	0.18167	4.30882e-05	0.000277896	498	482
ADORA1	0.193263	1.32382e-05	0.000100501	498	501
ADORA2A	0.243187	3.53507e-08	5.31504e-07	498	501
ADORA3	0.22468	3.74348e-07	4.41898e-06	498	501
ADRA1B	0.213193	1.46861e-06	1.49033e-05	498	482
ADRB1	0.220357	6.31562e-07	7.03006e-06	498	500
ADRB2	0.302248	4.82561e-12	1.48332e-10	498	501
ADRB3	0.203332	4.47859e-06	3.97322e-05	498	404
ADSS	-0.190197	1.82133e-05	0.000132229	498	501
AFAP1L1	0.219647	6.87537e-07	7.59844e-06	498	501
AFF3	0.288507	4.64141e-11	1.24077e-09	498	501
AG2	0.446567	6.28958e-26	6.83456e-24	498	501
AGBL1	0.382146	7.24067e-19	4.65046e-17	498	319
AGER	0.517842	1.01833e-35	1.79575e-33	498	501
AGFG1	0.20487	3.77715e-06	3.42809e-05	498	501
AGK	-0.173983	9.06157e-05	0.000535621	498	501
AGR2	0.40707	2.03159e-21	1.55882e-19	498	501
AGR3	0.709737	6.07006e-78	4.20781e-75	498	472
AGRP	0.294748	1.68538e-11	4.78549e-10	498	328
AGTR1	0.272005	6.0094e-10	1.33341e-08	498	494
AGTR2	0.721479	1.10421e-81	8.87917e-79	498	418
AGTRAP	0.189935	1.87121e-05	0.000135167	498	501
AHCTF1	-0.26444	1.83793e-09	3.67274e-08	498	501
AHCYL2	0.491603	7.63034e-32	1.12789e-29	498	501
AHR	0.189856	1.88662e-05	0.00013589	498	501
AIF1	0.284969	8.15372e-11	2.08808e-09	498	501
AIG1	0.166434	0.000182468	0.000978172	498	501
AIM1	0.196482	9.41774e-06	7.48911e-05	498	501
AK1	0.314879	5.40655e-13	1.88694e-11	498	501
AKAP12	0.185657	2.89462e-05	0.00019786	498	501
AKAP13	0.203274	4.50728e-06	3.99338e-05	498	501
AKAP14	0.181404	4.42376e-05	0.000284397	498	347
AKAP2	0.24222	4.01832e-08	5.97487e-07	498	501
AKAP8L	-0.267896	1.10766e-09	2.30271e-08	498	501
AKAP8	-0.226454	3.01096e-07	3.63321e-06	498	501
AKNA	0.173243	9.7182e-05	0.000569744	498	501
AKR1A1	0.217402	8.97628e-07	9.63428e-06	498	501
ALDH1A2	0.399566	1.25634e-20	9.31966e-19	498	500
ALDH1A3	0.246583	2.24392e-08	3.56879e-07	498	501
ALDH2	0.200687	5.98566e-06	5.04822e-05	498	501
ALDH3B1	0.317382	3.46017e-13	1.24883e-11	498	501
ALG14	0.198149	7.87785e-06	6.40685e-05	498	501
ALG1	0.184862	3.13575e-05	0.000212035	498	501
ALLC	-0.183055	3.75662e-05	0.000246956	498	234
ALMS1	-0.236084	8.94993e-08	1.24169e-06	498	501
ALOX12P2	-0.175847	7.58838e-05	0.000457968	498	500
ALOX15B	0.468602	1.03189e-28	1.32128e-26	498	501
ALOX5AP	0.366047	2.48674e-17	1.43652e-15	498	501
ALOX5	0.244775	2.86052e-08	4.42687e-07	498	501
ALPK3	0.266221	1.41705e-09	2.87168e-08	498	501
ALPL	0.529756	1.36242e-37	2.85299e-35	498	501
ALPP	0.2893	4.08649e-11	1.09974e-09	498	422
ALS2	-0.171192	0.000117787	0.000671355	498	501
AMHR2	0.217181	9.21342e-07	9.84152e-06	498	342
AMH	-0.258926	4.06153e-09	7.43615e-08	498	473
AMICA1	0.365668	2.69637e-17	1.54872e-15	498	501
AMIGO2	0.18913	2.03283e-05	0.00014512	498	501
AMPD3	0.171049	0.00011937	0.00067961	498	501
AMY1A	0.739809	6.35824e-88	5.80999e-85	498	486
AMY2A	0.573888	3.18567e-45	9.01992e-43	498	407
ANAPC2	-0.175279	8.01152e-05	0.000480847	498	501
ANAPC7	-0.173272	9.69104e-05	0.000568648	498	501
ANGEL2	-0.202748	4.77631e-06	4.19659e-05	498	501
ANGPTL1	0.255546	6.54387e-09	1.14892e-07	498	498
ANGPTL4	0.244937	2.79922e-08	4.33535e-07	498	501
ANG	0.242405	3.92137e-08	5.85236e-07	498	501
ANK2	0.19047	1.77075e-05	0.000129069	498	501
ANKHD1	-0.172911	0.000100271	0.000584266	498	501
ANKLE1	-0.200059	6.40831e-06	5.3566e-05	498	501
ANKRD13B	-0.337533	8.15285e-15	3.70762e-13	498	501
ANKRD13C	0.170111	0.00013024	0.000732938	498	501
ANKRD16	-0.233061	1.31734e-07	1.75148e-06	498	501
ANKRD1	0.441202	2.79553e-25	2.89683e-23	498	476
ANKRD23	-0.225798	3.2642e-07	3.90133e-06	498	501
ANKRD26	-0.195304	1.06746e-05	8.33366e-05	498	501
ANKRD34A	-0.17094	0.000120591	0.000685392	498	501
ANKRD43	-0.172886	0.000100504	0.000584954	498	491
ANKRD55	0.184755	3.16961e-05	0.000213893	498	412
ANO3	0.331613	2.52391e-14	1.07954e-12	498	488
ANO5	0.292924	2.27173e-11	6.33405e-10	498	493
ANO8	-0.202029	5.16891e-06	4.46735e-05	498	501
ANP32B	-0.190163	1.82773e-05	0.000132598	498	501
ANP32E	-0.222341	4.97468e-07	5.67249e-06	498	501
ANTXR2	0.243247	3.507e-08	5.28099e-07	498	501
ANXA11	0.195793	1.01337e-05	7.96397e-05	498	501
ANXA2P2	0.207186	2.91529e-06	2.73349e-05	498	501
ANXA2	0.208027	2.6516e-06	2.51677e-05	498	501
ANXA3	0.197563	8.38915e-06	6.76741e-05	498	501
ANXA5	0.20155	5.44763e-06	4.67009e-05	498	501
AOC3	0.41258	5.1755e-22	4.19529e-20	498	501
AOX1	0.249379	1.53566e-08	2.53045e-07	498	500
AP1S3	0.191346	1.61697e-05	0.000119332	498	501
APBA2	-0.190572	1.75211e-05	0.000127896	498	501
APBB1IP	0.3177	3.26853e-13	1.18605e-11	498	501
APEH	0.212105	1.66529e-06	1.66223e-05	498	501
APH1B	0.201155	5.6877e-06	4.8408e-05	498	501
APLN	0.255518	6.56964e-09	1.15143e-07	498	501
APLP2	0.251431	1.15904e-08	1.9547e-07	498	501
APOB48R	0.217607	8.76153e-07	9.42896e-06	498	501
APOBEC4	0.197418	8.5205e-06	6.85974e-05	498	340
APOB	0.181323	4.45897e-05	0.000286111	498	437
APOC1	0.313292	7.15883e-13	2.477e-11	498	501
APOC2	0.276985	2.82438e-10	6.564e-09	498	501
APOC4	0.212549	1.58213e-06	1.59107e-05	498	308
APOE	0.195373	1.05963e-05	8.27891e-05	498	501
APOH	0.446212	6.94699e-26	7.4965e-24	498	302
APOL1	0.175277	8.01292e-05	0.000480847	498	501
AQP1	0.587078	9.78713e-48	2.98107e-45	498	501
AQP3	0.253072	9.23929e-09	1.5794e-07	498	501
AQP4	0.773325	8.1214e-101	1.36054e-97	498	490
AQP7	0.244738	2.87457e-08	4.44519e-07	498	410
AQP9	0.350772	5.95716e-16	3.08651e-14	498	501
ARAF	0.182749	3.87237e-05	0.000253654	498	501
AREG	0.274479	4.13762e-10	9.39871e-09	498	501
ARF4	0.268756	9.75376e-10	2.05966e-08	498	501
ARHGAP11B	-0.187712	2.35041e-05	0.000164922	498	500
ARHGAP15	0.275286	3.66092e-10	8.41091e-09	498	501
ARHGAP18	0.344986	1.89799e-15	9.35179e-14	498	501
ARHGAP20	0.315509	4.83435e-13	1.69904e-11	498	501
ARHGAP25	0.231602	1.58464e-07	2.06188e-06	498	501
ARHGAP29	0.283551	1.01963e-10	2.55582e-09	498	501
ARHGAP30	0.179901	5.12709e-05	0.000323115	498	501
ARHGAP31	0.183253	3.68323e-05	0.000243006	498	501
ARHGAP33	-0.242949	3.64861e-08	5.46965e-07	498	501
ARHGAP42	0.198376	7.68802e-06	6.26732e-05	498	501
ARHGAP6	0.245945	2.44528e-08	3.84945e-07	498	501
ARHGAP9	0.196188	9.71722e-06	7.68773e-05	498	501
ARHGDIB	0.272576	5.51528e-10	1.23056e-08	498	501
ARHGEF11	-0.246031	2.41689e-08	3.81371e-07	498	501
ARHGEF15	0.29196	2.65789e-11	7.36988e-10	498	501
ARHGEF38	0.480472	2.67569e-30	3.65914e-28	498	440
ARHGEF3	0.234398	1.11108e-07	1.50614e-06	498	501
ARHGEF6	0.185756	2.86606e-05	0.000196174	498	501
ARHGEF7	-0.166278	0.000185069	0.000990272	498	501
ARID4B	-0.168745	0.000147737	0.000814801	498	501
ARL6IP5	0.318844	2.66095e-13	9.88782e-12	498	501
ARMC3	0.192238	1.47367e-05	0.00011009	498	431
ARMC6	-0.185445	2.95717e-05	0.00020145	498	501
ARNTL	0.220232	6.41153e-07	7.12893e-06	498	501
ARPC2	0.236232	8.78148e-08	1.22084e-06	498	501
ARPC4	0.21452	1.25877e-06	1.29571e-05	498	501
ARRB1	0.305857	2.60973e-12	8.27498e-11	498	501
ARRB2	0.249003	1.61644e-08	2.6462e-07	498	501
ARRDC3	0.384275	4.46857e-19	2.97456e-17	498	501
ARSA	0.187968	2.28982e-05	0.000161121	498	501
ARSE	0.293317	2.13072e-11	5.98237e-10	498	497
ART4	0.284677	8.53879e-11	2.17285e-09	498	417
ASAH1	0.396227	2.78399e-20	2.01319e-18	498	501
ASB16	-0.212147	1.65721e-06	1.65499e-05	498	498
ASB2	0.183222	3.69449e-05	0.000243669	498	501
ASF1B	-0.244499	2.96813e-08	4.57228e-07	498	501
ASGR1	0.234181	1.14224e-07	1.542e-06	498	501
ASGR2	0.286944	5.95918e-11	1.55783e-09	498	496
ASH1L	-0.206692	3.08142e-06	2.87184e-05	498	501
ASL	0.262303	2.50434e-09	4.85017e-08	498	501
ASNS	-0.186411	2.68229e-05	0.000185198	498	501
ASPA	0.320424	2.00026e-13	7.5585e-12	498	448
ASPM	-0.272911	5.2442e-10	1.17399e-08	498	501
ASPSCR1	-0.172376	0.000105442	0.000610482	498	501
ASS1	0.186593	2.63332e-05	0.00018245	498	501
ATAD2B	-0.167526	0.0001652	0.000896121	498	501
ATAD2	-0.238265	6.75051e-08	9.57696e-07	498	501
ATAD5	-0.304072	3.54088e-12	1.1036e-10	498	501
ATG4A	0.20128	5.61067e-06	4.78741e-05	498	501
ATG4D	-0.218088	8.27695e-07	8.96023e-06	498	501
ATG7	0.217721	8.64407e-07	9.32752e-06	498	501
ATG9B	-0.180935	4.6326e-05	0.000295554	498	501
ATL3	0.171241	0.000117246	0.000668839	498	501
ATOH8	0.62143	7.49694e-55	2.64405e-52	498	501
ATP10A	0.250956	1.23734e-08	2.07458e-07	498	501
ATP10B	0.255263	6.80928e-09	1.1862e-07	498	500
ATP11A	0.200389	6.18321e-06	5.19654e-05	498	501
ATP13A4	0.427811	1.03306e-23	9.58318e-22	498	499
ATP1A2	0.255137	6.9297e-09	1.20613e-07	498	481
ATP1A3	-0.188685	2.12784e-05	0.000150832	498	500
ATP2A1	-0.191855	1.53359e-05	0.000113763	498	500
ATP2B2	-0.167654	0.000163285	0.000887645	498	441
ATP2C2	0.234339	1.11944e-07	1.51339e-06	498	501
ATP6V0B	0.172947	9.99329e-05	0.00058315	498	501
ATP6V0D1	0.292371	2.48615e-11	6.92231e-10	498	501
ATP6V0D2	0.267061	1.25267e-09	2.57533e-08	498	501
ATP6V0E1	0.203863	4.22346e-06	3.77017e-05	498	501
ATP6V1B2	0.204145	4.09352e-06	3.67211e-05	498	501
ATP6V1D	0.166973	0.000173749	0.000936175	498	501
ATP6V1G2	-0.167277	0.000169001	0.000914026	498	500
ATP8A1	0.425323	1.98484e-23	1.78929e-21	498	501
ATP8B4	0.25701	5.32729e-09	9.51951e-08	498	501
ATRIP	-0.239277	5.91634e-08	8.49544e-07	498	501
ATXN2L	-0.230275	1.87237e-07	2.39441e-06	498	501
ATXN7L2	-0.206695	3.08043e-06	2.87184e-05	498	501
AURKAPS1	-0.245823	2.48549e-08	3.90053e-07	498	501
AURKB	-0.201589	5.4245e-06	4.65622e-05	498	501
AWAT2	0.353288	3.57172e-16	1.87473e-14	498	291
AZGP1	0.415209	2.67173e-22	2.22862e-20	498	499
AZI1	-0.220447	6.24818e-07	6.97043e-06	498	501
AZI2	0.17452	8.61185e-05	0.000512201	498	501
AZU1	0.207125	2.93525e-06	2.74836e-05	498	339
B2M	0.170497	0.00012565	0.000710535	498	501
B3GALT4	0.169074	0.000143335	0.000794884	498	501
B3GNT3	0.20491	3.76031e-06	3.41589e-05	498	499
B3GNT6	0.445986	7.40169e-26	7.91469e-24	498	399
B3GNT7	0.33873	6.46874e-15	2.98945e-13	498	501
B3GNT8	0.202424	4.94966e-06	4.3131e-05	498	501
B4GALNT1	-0.192727	1.40021e-05	0.000105346	498	501
B4GALT6	-0.197274	8.65335e-06	6.94999e-05	498	501
BAAT	0.484908	6.58406e-31	9.19162e-29	498	489
BAI1	-0.169771	0.000134402	0.000751987	498	500
BANK1	0.402081	6.85714e-21	5.14362e-19	498	501
BANP	-0.200635	6.01938e-06	5.06732e-05	498	501
BARX1	-0.194492	1.16311e-05	8.95515e-05	498	488
BASP1	0.167771	0.000161551	0.000880363	498	501
BAT2L2	-0.171697	0.00011236	0.000645735	498	501
BATF	0.220916	5.90635e-07	6.62217e-06	498	501
BAZ1B	-0.203167	4.56117e-06	4.03532e-05	498	501
BBOX1	0.16699	0.000173476	0.000935206	498	496
BBS12	0.170173	0.000129497	0.000729821	498	501
BCAP29	0.174326	8.77218e-05	0.000520505	498	501
BCAR3	0.17146	0.000114876	0.000657934	498	501
BCAS1	0.167241	0.000169557	0.000916782	498	501
BCL10	0.239789	5.53321e-08	7.9967e-07	498	501
BCL11A	-0.174037	9.01522e-05	0.000533195	498	501
BCL2A1	0.252695	9.73495e-09	1.65849e-07	498	501
BCL2L15	0.444908	1.00032e-25	1.06399e-23	498	496
BCL6B	0.298089	9.6986e-12	2.85881e-10	498	501
BCL7A	-0.216908	9.51494e-07	1.01152e-05	498	501
BCOR	-0.182977	3.78564e-05	0.00024862	498	501
BDH2	0.188575	2.1519e-05	0.000152216	498	501
BEST1	0.171693	0.000112401	0.000645785	498	501
BET1L	0.218199	8.1687e-07	8.86214e-06	498	501
BFSP2	0.168238	0.000154781	0.000849225	498	424
BHLHE22	0.20675	3.06155e-06	2.8573e-05	498	501
BHLHE40	0.243899	3.21528e-08	4.89917e-07	498	501
BIN2	0.226379	3.03885e-07	3.66247e-06	498	501
BIRC3	0.231939	1.51852e-07	1.98484e-06	498	501
BIRC7	0.372347	6.3801e-18	3.82863e-16	498	488
BLK	0.243035	3.6073e-08	5.4158e-07	498	492
BLM	-0.199465	6.83533e-06	5.65708e-05	498	501
BLNK	0.229439	2.07887e-07	2.61852e-06	498	501
BMP2	0.240041	5.35368e-08	7.76516e-07	498	501
BMP3	0.365279	2.92954e-17	1.67308e-15	498	493
BMP5	0.456315	3.90469e-27	4.51126e-25	498	474
BOK	0.226747	2.90406e-07	3.52326e-06	498	501
BOLL	-0.181256	4.48857e-05	0.000287552	498	327
BPTF	-0.208574	2.49239e-06	2.38479e-05	498	501
BRAP	-0.187246	2.46461e-05	0.000171796	498	501
BRCA1	-0.259503	3.74131e-09	6.96404e-08	498	501
BRCA2	-0.230992	1.71106e-07	2.20553e-06	498	501
BRD3	-0.257503	4.96869e-09	8.9664e-08	498	501
BRD4	-0.227081	2.78659e-07	3.39508e-06	498	501
BREA2	-0.200297	6.24501e-06	5.23971e-05	498	496
BRI3	0.200677	5.99219e-06	5.04866e-05	498	501
BRIP1	-0.2561	6.05529e-09	1.06968e-07	498	501
BRSK1	-0.211846	1.71563e-06	1.70824e-05	498	501
BSN	-0.231689	1.56726e-07	2.04323e-06	498	500
BST1	0.244369	3.01993e-08	4.63787e-07	498	501
BTBD9	0.178674	5.77859e-05	0.000358651	498	501
BTC	0.191964	1.51634e-05	0.000112733	498	492
BTD	0.319943	2.18218e-13	8.16915e-12	498	501
BTK	0.307532	1.95636e-12	6.36386e-11	498	501
BTLA	0.236647	8.3239e-08	1.16124e-06	498	498
BTNL8	0.223733	4.20172e-07	4.85443e-06	498	458
BUB1B	-0.236072	8.96429e-08	1.24282e-06	498	501
BUB1	-0.211329	1.82079e-06	1.80046e-05	498	501
BZW1	0.17834	5.96896e-05	0.000369326	498	501
C10orf107	0.224962	3.61625e-07	4.28136e-06	498	448
C10orf10	0.242096	4.08499e-08	6.06951e-07	498	501
C10orf11	0.272657	5.4483e-10	1.21697e-08	498	501
C10orf128	0.310961	1.07812e-12	3.61827e-11	498	494
C10orf137	-0.174285	8.80595e-05	0.000522212	498	501
C10orf26	0.202701	4.80123e-06	4.20912e-05	498	501
C10orf32	0.169012	0.000144149	0.000798961	498	501
C10orf4	-0.185511	2.93756e-05	0.000200318	498	501
C10orf54	0.234105	1.15339e-07	1.55406e-06	498	501
C10orf67	0.227113	2.7756e-07	3.38374e-06	498	438
C10orf81	0.212729	1.54958e-06	1.56224e-05	498	497
C10orf91	-0.207824	2.71307e-06	2.56301e-05	498	496
C10orf95	0.181043	4.5839e-05	0.000292819	498	501
C11orf59	0.167556	0.000164746	0.000894138	498	501
C11orf66	0.200685	5.98665e-06	5.04822e-05	498	496
C11orf70	0.174148	8.92137e-05	0.000528422	498	500
C11orf84	-0.166232	0.000185851	0.000993398	498	501
C11orf88	0.183352	3.64714e-05	0.000241179	498	483
C12orf26	0.168006	0.000158103	0.000865283	498	501
C12orf34	-0.167471	0.00016603	0.000899891	498	501
C12orf48	-0.182077	4.13904e-05	0.00026867	498	501
C12orf49	0.317577	3.3415e-13	1.21035e-11	498	501
C12orf53	-0.192649	1.41162e-05	0.000106006	498	501
C12orf69	0.23287	1.3497e-07	1.7886e-06	498	499
C12orf73	-0.18368	3.52952e-05	0.000234481	498	501
C13orf15	0.355865	2.10544e-16	1.11383e-14	498	501
C13orf16	-0.190932	1.68803e-05	0.000123893	498	425
C13orf18	0.209547	2.23192e-06	2.15609e-05	498	501
C13orf23	-0.205459	3.53726e-06	3.24257e-05	498	501
C13orf30	0.303641	3.81027e-12	1.18573e-10	498	454
C13orf33	0.324943	8.7582e-14	3.49338e-12	498	501
C14orf162	-0.188741	2.11564e-05	0.000150232	498	446
C14orf181	-0.177228	6.64651e-05	0.00040699	498	501
C14orf45	0.201014	5.77606e-06	4.9077e-05	498	501
C14orf86	0.26706	1.25288e-09	2.57533e-08	498	283
C15orf24	0.170461	0.000126071	0.000712713	498	501
C15orf26	0.257453	5.00409e-09	9.01409e-08	498	474
C15orf37	0.174373	8.73265e-05	0.000518465	498	501
C15orf38	0.190345	1.79377e-05	0.000130511	498	501
C15orf42	-0.24036	5.13432e-08	7.46313e-07	498	501
C15orf48	0.259279	3.86244e-09	7.14979e-08	498	501
C15orf57	0.195257	1.07269e-05	8.36927e-05	498	501
C15orf58	0.182045	4.15241e-05	0.000269451	498	501
C16orf54	0.295412	1.51083e-11	4.31425e-10	498	501
C16orf59	-0.24257	3.8363e-08	5.73819e-07	498	501
C16orf71	0.177035	6.77066e-05	0.000413836	498	500
C16orf75	-0.2198	6.75127e-07	7.4695e-06	498	501
C16orf89	0.801	2.90409e-113	9.73014e-110	498	496
C17orf104	-0.189521	1.95279e-05	0.000140203	498	501
C17orf53	-0.253494	8.71352e-09	1.49461e-07	498	501
C17orf54	0.37627	2.69331e-18	1.6711e-16	498	258
C17orf56	-0.209493	2.24572e-06	2.16734e-05	498	501
C17orf60	0.262105	2.57692e-09	4.98114e-08	498	499
C17orf65	-0.245136	2.72574e-08	4.23786e-07	498	501
C17orf69	-0.291877	2.69398e-11	7.4494e-10	498	501
C17orf71	-0.175874	7.5693e-05	0.000457229	498	501
C17orf72	0.183906	3.45081e-05	0.000229936	498	501
C17orf75	-0.172905	0.000100322	0.000584266	498	501
C17orf86	-0.195493	1.04625e-05	8.19672e-05	498	501
C17orf87	0.275168	3.7271e-10	8.54342e-09	498	500
C17orf90	-0.183773	3.49703e-05	0.000232553	498	501
C17orf91	0.284597	8.64702e-11	2.19761e-09	498	501
C17orf96	-0.226525	2.98476e-07	3.60593e-06	498	501
C18orf16	0.209666	2.2019e-06	2.13324e-05	498	383
C19orf10	0.193005	1.36006e-05	0.000102671	498	501
C19orf21	0.22874	2.26831e-07	2.81654e-06	498	500
C19orf33	0.196379	9.52112e-06	7.5534e-05	498	500
C19orf35	0.239003	6.13147e-08	8.78552e-07	498	498
C19orf38	0.227147	2.76392e-07	3.37564e-06	498	501
C19orf44	-0.28436	8.97682e-11	2.27568e-09	498	501
C19orf45	-0.195553	1.03957e-05	8.14755e-05	498	439
C19orf46	0.18382	3.48085e-05	0.000231707	498	499
C19orf48	-0.178979	5.60951e-05	0.000349452	498	501
C19orf57	-0.233075	1.31506e-07	1.74962e-06	498	501
C19orf59	0.494664	2.80323e-32	4.23709e-30	498	501
C19orf60	-0.189369	1.98352e-05	0.000142105	498	501
C19orf73	-0.199212	7.025e-06	5.79458e-05	498	501
C1GALT1	0.246901	2.1495e-08	3.4322e-07	498	501
C1QA	0.22956	2.04783e-07	2.58428e-06	498	501
C1QB	0.224418	3.8648e-07	4.53821e-06	498	501
C1QC	0.21545	1.12929e-06	1.17566e-05	498	501
C1QL4	-0.234347	1.11836e-07	1.51294e-06	498	477
C1QTNF2	0.203831	4.23853e-06	3.78195e-05	498	501
C1QTNF7	0.333388	1.80329e-14	7.8297e-13	498	498
C1RL	0.243869	3.22818e-08	4.91184e-07	498	501
C1R	0.233872	1.18822e-07	1.59671e-06	498	501
C1S	0.193026	1.357e-05	0.000102556	498	501
C1orf104	-0.171238	0.000117287	0.000668887	498	501
C1orf112	-0.222332	4.9798e-07	5.67511e-06	498	501
C1orf116	0.318365	2.90061e-13	1.06796e-11	498	501
C1orf124	-0.187693	2.35489e-05	0.000165179	498	501
C1orf129	0.171335	0.000116231	0.000663994	498	334
C1orf130	0.387742	2.02091e-19	1.36789e-17	498	500
C1orf131	-0.239836	5.49949e-08	7.96515e-07	498	501
C1orf135	-0.199208	7.0274e-06	5.79458e-05	498	501
C1orf141	0.175306	7.99135e-05	0.000479839	498	218
C1orf144	0.198874	7.28569e-06	5.98302e-05	498	501
C1orf150	0.317524	3.37303e-13	1.21957e-11	498	455
C1orf158	0.21686	9.56982e-07	1.01628e-05	498	261
C1orf162	0.3824	6.83652e-19	4.40495e-17	498	501
C1orf168	0.184463	3.26375e-05	0.000219418	498	457
C1orf173	0.19735	8.5833e-06	6.90477e-05	498	468
C1orf186	0.322494	1.37246e-13	5.29649e-12	498	493
C1orf189	0.191053	1.66701e-05	0.000122575	498	202
C1orf192	0.211865	1.71187e-06	1.70534e-05	498	501
C1orf194	0.186944	2.54135e-05	0.000176716	498	383
C1orf210	0.184769	3.16508e-05	0.000213659	498	501
C1orf212	0.199333	6.93336e-06	5.72879e-05	498	501
C1orf213	-0.192385	1.4512e-05	0.000108532	498	501
C1orf220	-0.210687	1.9597e-06	1.92175e-05	498	500
C1orf230	0.223849	4.14289e-07	4.80027e-06	498	254
C1orf35	-0.215693	1.09753e-06	1.14693e-05	498	501
C1orf38	0.263511	2.10342e-09	4.12813e-08	498	501
C1orf54	0.173664	9.3397e-05	0.000549959	498	501
C1orf61	-0.202256	5.04174e-06	4.38383e-05	498	469
C1orf69	-0.169152	0.000142308	0.000790062	498	501
C1orf77	-0.244047	3.15269e-08	4.81521e-07	498	501
C1orf87	0.212604	1.57214e-06	1.58261e-05	498	325
C1orf88	0.33439	1.48999e-14	6.52578e-13	498	497
C1orf89	0.193178	1.33556e-05	0.000101202	498	501
C1orf92	0.178186	6.05834e-05	0.000374166	498	355
C1orf96	-0.256134	6.02581e-09	1.06541e-07	498	501
C20orf114	0.310729	1.1229e-12	3.756e-11	498	474
C20orf117	-0.184445	3.26991e-05	0.000219629	498	501
C20orf151	-0.190782	1.71447e-05	0.000125651	498	501
C20orf160	0.184461	3.26459e-05	0.000219418	498	501
C20orf46	-0.184514	3.24715e-05	0.000218392	498	501
C20orf56	0.648938	3.19941e-61	1.46177e-58	498	446
C20orf70	0.411769	6.34013e-22	5.07791e-20	498	265
C20orf72	-0.202511	4.90244e-06	4.28494e-05	498	501
C20orf85	0.275028	3.80727e-10	8.68758e-09	498	385
C21orf121	0.206479	3.15601e-06	2.93321e-05	498	301
C21orf128	0.198572	7.52717e-06	6.14867e-05	498	370
C21orf45	-0.279823	1.82438e-10	4.38177e-09	498	501
C21orf58	-0.263662	2.05765e-09	4.04744e-08	498	501
C22orf25	0.177481	6.48589e-05	0.000398417	498	501
C2CD4A	0.340283	4.78271e-15	2.26228e-13	498	501
C2CD4B	0.316805	3.83677e-13	1.37243e-11	498	500
C2orf3	-0.208807	2.42754e-06	2.3294e-05	498	501
C2orf40	0.17036	0.000127269	0.000718074	498	455
C2orf42	-0.217608	8.761e-07	9.42896e-06	498	501
C2orf44	-0.285032	8.07192e-11	2.07241e-09	498	501
C2orf48	-0.196953	8.95521e-06	7.16381e-05	498	491
C2orf54	0.168191	0.000155453	0.000852681	498	500
C2orf58	0.251894	1.08739e-08	1.84006e-07	498	488
C2orf62	0.261462	2.82676e-09	5.41203e-08	498	434
C2orf68	-0.205885	3.37307e-06	3.11336e-05	498	501
C2orf77	0.176154	7.36862e-05	0.000446044	498	501
C2orf84	0.186636	2.6219e-05	0.000181752	498	477
C2	0.454593	6.42108e-27	7.29283e-25	498	501
C3AR1	0.213777	1.37247e-06	1.40275e-05	498	501
C3orf16	0.218592	7.79604e-07	8.51297e-06	498	454
C3orf23	0.167728	0.000162176	0.000882571	498	501
C3orf36	0.260943	3.0455e-09	5.79769e-08	498	495
C3orf52	0.196223	9.68158e-06	7.66859e-05	498	501
C3orf71	-0.183473	3.60338e-05	0.0002386	498	501
C3	0.519139	6.41984e-36	1.18402e-33	498	501
C4A	0.554623	9.43471e-42	2.37082e-39	498	501
C4BPA	0.784153	1.81767e-105	4.06008e-102	498	484
C4BPB	0.360079	8.77867e-17	4.78259e-15	498	405
C4orf19	0.303332	4.01592e-12	1.24394e-10	498	500
C4orf21	-0.238928	6.19222e-08	8.84734e-07	498	501
C4orf22	0.177123	6.71412e-05	0.00041063	498	222
C4orf31	0.639115	7.15346e-59	2.87612e-56	498	501
C4orf32	0.228835	2.24161e-07	2.79028e-06	498	501
C4orf34	0.24208	4.0936e-08	6.07781e-07	498	501
C4orf44	0.172879	0.000100572	0.000585179	498	475
C4orf46	-0.17406	8.99626e-05	0.00053223	498	501
C4orf52	0.193654	1.27046e-05	9.6853e-05	498	501
C5AR1	0.306727	2.24752e-12	7.21754e-11	498	501
C5orf23	0.172906	0.000100317	0.000584266	498	501
C5orf25	-0.262335	2.49309e-09	4.83303e-08	498	501
C5orf32	0.267245	1.21915e-09	2.51887e-08	498	501
C5orf36	0.220817	5.97719e-07	6.69412e-06	498	501
C5orf49	0.293221	2.16445e-11	6.06015e-10	498	482
C5orf4	0.279059	2.05313e-10	4.89608e-09	498	501
C5orf62	0.204549	3.91432e-06	3.53184e-05	498	501
C5	0.269849	8.29334e-10	1.78121e-08	498	501
C6orf103	0.216813	9.62272e-07	1.02136e-05	498	258
C6orf105	0.182223	4.07995e-05	0.000265349	498	501
C6orf118	0.18641	2.68267e-05	0.000185198	498	330
C6orf134	-0.177492	6.47936e-05	0.000398211	498	501
C6orf138	0.224333	3.90539e-07	4.56985e-06	498	495
C6orf147	-0.172941	9.99817e-05	0.000583265	498	499
C6orf204	0.182293	4.05148e-05	0.000263582	498	501
C6orf211	0.25663	5.61984e-09	9.989e-08	498	501
C6orf222	0.432487	2.98255e-24	2.86881e-22	498	449
C6orf59	0.171388	0.00011565	0.000661617	498	479
C6orf97	0.264315	1.87168e-09	3.73278e-08	498	501
C6	0.4366	9.8423e-25	9.74679e-23	498	429
C7orf23	0.229395	2.0905e-07	2.62987e-06	498	501
C7orf27	-0.213341	1.44372e-06	1.46656e-05	498	501
C7orf51	-0.25356	8.634e-09	1.48461e-07	498	494
C7orf57	0.168125	0.000156393	0.000856665	498	473
C7	0.583516	4.79313e-47	1.43815e-44	498	500
C8A	0.397372	2.12144e-20	1.55647e-18	498	188
C8B	0.494107	3.36582e-32	5.04949e-30	498	325
C8orf34	0.517474	1.16034e-35	2.02838e-33	498	481
C8orf39	-0.194443	1.16914e-05	8.99476e-05	498	500
C8orf48	0.180928	4.63581e-05	0.000295665	498	497
C8orf4	0.404899	3.45842e-21	2.64352e-19	498	501
C8orf77	-0.255302	6.77164e-09	1.18066e-07	498	496
C8orf79	0.191408	1.6067e-05	0.000118618	498	496
C8orf80	0.200315	6.23301e-06	5.23373e-05	498	496
C9orf100	-0.196394	9.50637e-06	7.54765e-05	498	501
C9orf128	0.18989	1.88002e-05	0.000135609	498	361
C9orf135	0.208606	2.4834e-06	2.37942e-05	498	321
C9orf140	-0.244465	2.98169e-08	4.58965e-07	498	501
C9orf150	0.185525	2.93351e-05	0.000200177	498	501
C9orf152	0.428048	9.70483e-24	9.07424e-22	498	497
C9orf163	-0.183907	3.45052e-05	0.000229936	498	497
C9orf167	0.335279	1.25723e-14	5.55474e-13	498	501
C9orf171	0.189922	1.87381e-05	0.000135258	498	421
C9orf43	-0.205553	3.50021e-06	3.213e-05	498	498
C9orf68	0.190047	1.84979e-05	0.000133812	498	501
C9orf70	0.169345	0.000139796	0.000777619	498	378
CA3	0.282367	1.22767e-10	3.04315e-09	498	486
CA4	0.442203	2.12057e-25	2.23193e-23	498	427
CA8	0.185872	2.83258e-05	0.000194346	498	490
CAB39	0.182403	4.00784e-05	0.000261238	498	501
CABC1	-0.181142	4.53934e-05	0.000290434	498	501
CABLES2	-0.221888	5.25435e-07	5.95424e-06	498	501
CABP1	-0.20975	2.18087e-06	2.11593e-05	498	474
CABP4	0.18743	2.41885e-05	0.000169001	498	472
CABYR	-0.177882	6.23976e-05	0.000384307	498	500
CACNA1B	-0.188184	2.23972e-05	0.000158038	498	482
CACNA1D	0.204131	4.09997e-06	3.67626e-05	498	498
CACNA2D2	0.489178	1.6746e-31	2.43945e-29	498	501
CACNB3	-0.186282	2.71756e-05	0.000187286	498	501
CACNG6	0.166576	0.000180136	0.000966962	498	397
CACYBP	-0.173535	9.45415e-05	0.000556209	498	501
CADM1	0.186965	2.53596e-05	0.000176402	498	501
CADM3	0.381815	7.80221e-19	4.99515e-17	498	500
CADPS2	0.276977	2.82795e-10	6.5647e-09	498	501
CAD	-0.199963	6.47546e-06	5.4015e-05	498	501
CALCRL	0.298924	8.4382e-12	2.51308e-10	498	501
CAMK1G	0.216411	1.00892e-06	1.06413e-05	498	500
CAMKV	-0.25493	7.13341e-09	1.23837e-07	498	395
CAMSAP1	-0.173866	9.16231e-05	0.000540939	498	501
CAP1	0.225328	3.45768e-07	4.11544e-06	498	501
CAPN13	0.437975	6.77062e-25	6.90913e-23	498	497
CAPN2	0.234902	1.0417e-07	1.42361e-06	498	501
CAPN3	0.227903	2.517e-07	3.09664e-06	498	501
CAPN8	0.711425	1.80748e-78	1.2977e-75	498	471
CAPSL	0.188661	2.13317e-05	0.000151103	498	417
CAPS	0.200956	5.81279e-06	4.93682e-05	498	501
CAPZA1	0.168318	0.000153652	0.000844875	498	501
CAPZA2	0.256556	5.67883e-09	1.00849e-07	498	501
CAPZB	0.210178	2.07708e-06	2.02501e-05	498	501
CARD16	0.198148	7.87829e-06	6.40685e-05	498	501
CARD6	0.331843	2.41655e-14	1.03582e-12	498	501
CARM1	-0.197729	8.2417e-06	6.65906e-05	498	501
CASC3	-0.195937	9.97993e-06	7.85169e-05	498	501
CASC5	-0.180779	4.70444e-05	0.000299472	498	501
CASKIN1	-0.224947	3.62295e-07	4.28677e-06	498	495
CASP10	0.284329	9.02085e-11	2.28396e-09	498	501
CASP12	0.242392	3.92789e-08	5.85504e-07	498	366
CASP1	0.218048	8.31604e-07	8.99771e-06	498	501
CASP4	0.316274	4.21792e-13	1.49546e-11	498	501
CASP5	0.169532	0.000137398	0.00076704	498	476
CASP8AP2	-0.202802	4.74808e-06	4.17545e-05	498	501
CASQ2	0.179832	5.16198e-05	0.000324793	498	473
CASS4	0.342935	2.8459e-15	1.37527e-13	498	501
CATSPER1	0.283337	1.05446e-10	2.63e-09	498	477
CAT	0.316029	4.40658e-13	1.55413e-11	498	501
CAV1	0.233784	1.20164e-07	1.61258e-06	498	501
CAV2	0.223712	4.21217e-07	4.86372e-06	498	501
CBFA2T2	-0.240478	5.05528e-08	7.3589e-07	498	501
CBLN4	0.202196	5.07501e-06	4.40323e-05	498	440
CBX1	-0.287017	5.89038e-11	1.54588e-09	498	501
CBX2	-0.217343	9.03969e-07	9.69717e-06	498	501
CC2D1A	-0.256497	5.72596e-09	1.01528e-07	498	501
CC2D2A	0.172435	0.000104856	0.000607297	498	501
CCAR1	-0.224296	3.92308e-07	4.58255e-06	498	501
CCBE1	0.229895	1.96368e-07	2.49374e-06	498	495
CCDC102B	0.302337	4.75343e-12	1.46337e-10	498	501
CCDC108	0.188697	2.12528e-05	0.000150704	498	421
CCDC112	-0.197147	8.77161e-06	7.02813e-05	498	501
CCDC130	-0.208637	2.47492e-06	2.3726e-05	498	501
CCDC135	0.203623	4.33697e-06	3.86634e-05	498	417
CCDC136	-0.23099	1.7115e-07	2.20553e-06	498	500
CCDC13	0.191177	1.64561e-05	0.000121215	498	498
CCDC141	0.38134	8.68417e-19	5.52461e-17	498	491
CCDC142	-0.215532	1.11854e-06	1.16508e-05	498	501
CCDC149	0.182444	3.99126e-05	0.000260423	498	501
CCDC150	-0.263443	2.12413e-09	4.16192e-08	498	500
CCDC152	0.191538	1.58511e-05	0.000117239	498	500
CCDC153	0.169512	0.000137653	0.000768249	498	501
CCDC160	0.170294	0.000128046	0.000722051	498	445
CCDC18	-0.166269	0.00018523	0.000990865	498	501
CCDC21	-0.19374	1.259e-05	9.61249e-05	498	501
CCDC37	0.172311	0.000106084	0.000612985	498	365
CCDC41	-0.170865	0.00012143	0.000688799	498	501
CCDC42B	0.192692	1.40531e-05	0.000105661	498	483
CCDC43	-0.1821	4.12991e-05	0.000268164	498	501
CCDC45	-0.246189	2.36617e-08	3.73956e-07	498	501
CCDC48	0.266362	1.38797e-09	2.81842e-08	498	501
CCDC55	-0.171512	0.000114325	0.0006559	498	501
CCDC60	0.166588	0.000179944	0.000966187	498	376
CCDC65	0.199512	6.80031e-06	5.63274e-05	498	494
CCDC66	-0.173818	9.20419e-05	0.000543114	498	501
CCDC68	0.416554	1.90031e-22	1.61189e-20	498	501
CCDC69	0.460204	1.25615e-27	1.49423e-25	498	501
CCDC74B	-0.176095	7.41092e-05	0.0004482	498	501
CCDC77	-0.259545	3.71889e-09	6.92872e-08	498	501
CCDC80	0.196522	9.37783e-06	7.4692e-05	498	501
CCDC81	0.182816	3.84689e-05	0.000252149	498	501
CCDC85A	0.196006	9.90741e-06	7.81666e-05	498	501
CCDC87	-0.193011	1.35915e-05	0.000102671	498	498
CCDC99	-0.283639	1.00564e-10	2.52389e-09	498	501
CCL13	0.194189	1.20089e-05	9.21781e-05	498	501
CCL14	0.48074	2.45965e-30	3.38674e-28	498	500
CCL15	0.237871	7.10479e-08	1.0023e-06	498	324
CCL16	0.272983	5.18767e-10	1.16263e-08	498	214
CCL18	0.395437	3.35705e-20	2.40166e-18	498	501
CCL19	0.249328	1.54624e-08	2.54578e-07	498	501
CCL20	0.320922	1.82746e-13	6.93158e-12	498	500
CCL21	0.436841	9.21959e-25	9.17532e-23	498	501
CCL22	0.270554	7.46668e-10	1.62098e-08	498	500
CCL23	0.457972	2.41246e-27	2.80333e-25	498	470
CCL2	0.185429	2.9619e-05	0.000201704	498	501
CCL3L1	0.167173	0.000170617	0.000921527	498	495
CCNA2	-0.17882	5.69675e-05	0.000354337	498	501
CCNB2	-0.177292	6.60518e-05	0.000404706	498	501
CCNE2	-0.173137	9.81558e-05	0.00057428	498	501
CCNF	-0.189087	2.04184e-05	0.000145609	498	501
CCNG1	0.18857	2.15313e-05	0.000152249	498	501
CCNJL	0.42201	4.69594e-23	4.10445e-21	498	501
CCNYL1	0.223767	4.18406e-07	4.8396e-06	498	501
CCPG1	0.205725	3.43372e-06	3.16063e-05	498	501
CCR1	0.280247	1.70835e-10	4.13272e-09	498	501
CCR2	0.293828	1.95978e-11	5.54114e-10	498	501
CCR3	0.20447	3.94883e-06	3.55501e-05	498	467
CCR4	0.236166	8.85593e-08	1.22949e-06	498	493
CCR5	0.173584	9.40984e-05	0.000553765	498	501
CCR6	0.291651	2.79484e-11	7.71768e-10	498	501
CCR7	0.21256	1.58016e-06	1.58989e-05	498	501
CCR9	0.197326	8.60534e-06	6.91696e-05	498	374
CCRL2	0.358065	1.33573e-16	7.19898e-15	498	501
CCT3	-0.183563	3.57113e-05	0.000236854	498	501
CCT6P1	-0.199522	6.79313e-06	5.62911e-05	498	501
CCT7	-0.19968	6.67738e-06	5.54692e-05	498	501
CD101	0.211627	1.75947e-06	1.74411e-05	498	501
CD14	0.238514	6.53539e-08	9.31119e-07	498	501
CD151	0.305201	2.91992e-12	9.1861e-11	498	501
CD163L1	0.181259	4.48708e-05	0.000287548	498	501
CD163	0.326653	6.38546e-14	2.56734e-12	498	501
CD164L2	0.230647	1.78696e-07	2.29395e-06	498	498
CD180	0.33143	2.61266e-14	1.11276e-12	498	501
CD19	0.232801	1.36158e-07	1.7996e-06	498	495
CD1A	0.229717	2.00808e-07	2.54209e-06	498	496
CD1C	0.390214	1.14119e-19	7.88361e-18	498	499
CD1D	0.300752	6.21152e-12	1.87212e-10	498	501
CD1E	0.234054	1.16099e-07	1.56325e-06	498	494
CD200R1	0.194578	1.1526e-05	8.8811e-05	498	501
CD209	0.179155	5.51399e-05	0.000344355	498	501
CD226	0.203615	4.34096e-06	3.86819e-05	498	501
CD22	0.304446	3.32206e-12	1.04024e-10	498	501
CD244	0.223052	4.56374e-07	5.24556e-06	498	501
CD27	0.166247	0.0001856	0.000992527	498	501
CD28	0.216639	9.82161e-07	1.03973e-05	498	501
CD300A	0.345519	1.70735e-15	8.45392e-14	498	501
CD300C	0.313912	6.41729e-13	2.23195e-11	498	501
CD300E	0.230858	1.74017e-07	2.23674e-06	498	448
CD300LB	0.436908	9.05278e-25	9.05413e-23	498	499
CD300LF	0.311794	9.3179e-13	3.1482e-11	498	501
CD300LG	0.274359	4.21418e-10	9.54027e-09	498	392
CD302	0.389069	1.48799e-19	1.02442e-17	498	501
CD33	0.297624	1.04774e-11	3.07935e-10	498	501
CD34	0.202296	5.01976e-06	4.36922e-05	498	501
CD36	0.408562	1.40654e-21	1.08752e-19	498	501
CD37	0.251496	1.14875e-08	1.93898e-07	498	501
CD38	0.221629	5.42099e-07	6.12581e-06	498	501
CD3G	0.171352	0.000116038	0.000663267	498	500
CD40LG	0.228845	2.23884e-07	2.78857e-06	498	496
CD47	0.197906	8.08633e-06	6.55746e-05	498	501
CD48	0.286271	6.63237e-11	1.71597e-09	498	501
CD4	0.290333	3.45985e-11	9.41181e-10	498	501
CD52	0.340741	4.37418e-15	2.08331e-13	498	501
CD53	0.270601	7.415e-10	1.6115e-08	498	501
CD59	0.347256	1.2079e-15	6.11647e-14	498	501
CD5L	0.289903	3.7085e-11	1.00474e-09	498	330
CD63	0.312098	8.83459e-13	3.0102e-11	498	501
CD68	0.3341	1.57469e-14	6.8668e-13	498	501
CD69	0.215692	1.0977e-06	1.14693e-05	498	501
CD72	0.224159	3.98913e-07	4.64083e-06	498	501
CD74	0.338735	6.46196e-15	2.98945e-13	498	501
CD79A	0.235783	9.30425e-08	1.28464e-06	498	501
CD79B	0.243865	3.23009e-08	4.91184e-07	498	501
CD81	0.302592	4.55317e-12	1.40603e-10	498	501
CD84	0.216745	9.70011e-07	1.02849e-05	498	501
CD86	0.237387	7.56408e-08	1.06336e-06	498	501
CD93	0.320027	2.14911e-13	8.06037e-12	498	501
CD97	0.218879	7.53448e-07	8.24528e-06	498	501
CDC23	-0.1853	3.00076e-05	0.000204282	498	501
CDC25A	-0.230921	1.72659e-07	2.22213e-06	498	501
CDC25C	-0.249636	1.48259e-08	2.45304e-07	498	501
CDC42SE2	0.200842	5.88518e-06	4.98356e-05	498	501
CDC42	0.197562	8.39032e-06	6.76741e-05	498	501
CDC45	-0.173149	9.80452e-05	0.000573948	498	501
CDC5L	-0.196191	9.71405e-06	7.68773e-05	498	501
CDC6	-0.215023	1.18711e-06	1.22949e-05	498	501
CDC7	-0.212487	1.59361e-06	1.60022e-05	498	501
CDCA2	-0.200431	6.15443e-06	5.1745e-05	498	501
CDCA3	-0.191275	1.62903e-05	0.000120134	498	501
CDCA5	-0.185814	2.84933e-05	0.000195228	498	501
CDCA8	-0.184148	3.36849e-05	0.000225347	498	501
CDH10	0.231811	1.54327e-07	2.01326e-06	498	321
CDH15	0.28958	3.90625e-11	1.05406e-09	498	489
CDH17	0.342865	2.8852e-15	1.39092e-13	498	479
CDH3	0.184997	3.09349e-05	0.000209813	498	501
CDH5	0.374166	4.28353e-18	2.60156e-16	498	501
CDH6	0.21792	8.44315e-07	9.12541e-06	498	501
CDHR4	0.213692	1.38609e-06	1.41444e-05	498	388
CDK1	-0.196036	9.87586e-06	7.79483e-05	498	501
CDK2	-0.204018	4.15179e-06	3.7194e-05	498	501
CDK3	-0.193345	1.31248e-05	9.97535e-05	498	501
CDKL2	0.430959	4.48554e-24	4.29394e-22	498	500
CDKN1A	0.174455	8.66534e-05	0.000515019	498	501
CDO1	0.172669	0.000102577	0.000595519	498	499
CDT1	-0.267798	1.12375e-09	2.33135e-08	498	501
CEACAM21	0.261655	2.74951e-09	5.28931e-08	498	500
CEACAM3	0.38381	4.96655e-19	3.2843e-17	498	482
CEACAM4	0.356777	1.74435e-16	9.32627e-15	498	494
CEACAM6	0.408801	1.32591e-21	1.03715e-19	498	501
CEACAM8	0.231174	1.67242e-07	2.1621e-06	498	200
CEBPB	0.188047	2.27144e-05	0.000160108	498	501
CECR1	0.253972	8.1537e-09	1.40699e-07	498	501
CELA2B	0.184834	3.14469e-05	0.000212496	498	82
CELF2	0.359422	1.00694e-16	5.45619e-15	498	501
CEND1	-0.213947	1.34571e-06	1.37744e-05	498	491
CENPA	-0.253667	8.50683e-09	1.46541e-07	498	501
CENPE	-0.263977	1.96567e-09	3.88935e-08	498	501
CENPF	-0.289304	4.08386e-11	1.09974e-09	498	501
CENPH	-0.204621	3.88301e-06	3.51145e-05	498	501
CENPJ	-0.268383	1.03086e-09	2.16094e-08	498	501
CENPL	-0.189166	2.02543e-05	0.000144695	498	501
CENPO	-0.247195	2.0658e-08	3.3223e-07	498	501
CEP110	-0.219608	6.90741e-07	7.62965e-06	498	501
CEP152	-0.232428	1.42746e-07	1.8768e-06	498	501
CEP192	-0.198901	7.26481e-06	5.9683e-05	498	501
CEP250	-0.187383	2.43034e-05	0.000169643	498	501
CEP290	-0.205966	3.34254e-06	3.09085e-05	498	501
CEP350	-0.203864	4.22315e-06	3.77017e-05	498	501
CEP55	-0.181728	4.28447e-05	0.000276575	498	501
CEP76	-0.196134	9.7734e-06	7.72609e-05	498	501
CEP78	-0.239794	5.52966e-08	7.9967e-07	498	501
CERKL	0.238943	6.18018e-08	8.83642e-07	498	501
CETP	0.274134	4.36017e-10	9.83755e-09	498	499
CFB	0.486864	3.52569e-31	5.06263e-29	498	501
CFD	0.268136	1.06907e-09	2.23404e-08	498	501
CFH	0.291502	2.86316e-11	7.85026e-10	498	501
CFI	0.515979	1.9692e-35	3.38349e-33	498	501
CFL1	0.170411	0.000126668	0.000715485	498	501
CFL2	0.167204	0.000170133	0.000919406	498	501
CFLAR	0.267081	1.24902e-09	2.57264e-08	498	501
CFP	0.338585	6.65222e-15	3.06719e-13	498	501
CFTR	0.647898	5.72559e-61	2.50221e-58	498	492
CGNL1	0.199151	7.07117e-06	5.82112e-05	498	501
CH25H	0.260852	3.08515e-09	5.86209e-08	498	501
CHAF1A	-0.266136	1.43471e-09	2.90453e-08	498	501
CHAF1B	-0.204613	3.88648e-06	3.51145e-05	498	501
CHD6	-0.166623	0.000179371	0.000963371	498	501
CHERP	-0.286369	6.53067e-11	1.69401e-09	498	501
CHI3L1	0.485502	5.44907e-31	7.76899e-29	498	501
CHI3L2	0.463062	5.40745e-28	6.54855e-26	498	500
CHIA	0.58913	3.88575e-48	1.20177e-45	498	363
CHIT1	0.201333	5.57805e-06	4.76159e-05	498	500
CHKB	0.228857	2.23563e-07	2.7863e-06	498	501
CHL1	0.222235	5.03864e-07	5.73241e-06	498	501
CHMP2B	0.182402	4.00824e-05	0.000261238	498	501
CHP	0.303309	4.03174e-12	1.24692e-10	498	501
CHRDL1	0.328014	4.95753e-14	2.0339e-12	498	497
CHRDL2	0.361383	6.67829e-17	3.68829e-15	498	493
CHRNA3	-0.197939	8.05764e-06	6.53684e-05	498	497
CHRNA5	-0.22706	2.79409e-07	3.40216e-06	498	501
CHRNB2	-0.214175	1.3105e-06	1.34414e-05	498	496
CHST15	0.190207	1.81951e-05	0.000132145	498	501
CHTF18	-0.216592	9.87652e-07	1.04389e-05	498	501
CIB1	0.290062	3.61438e-11	9.80565e-10	498	501
CIITA	0.260698	3.15395e-09	5.97586e-08	498	501
CISH	0.51468	3.11058e-35	5.21099e-33	498	501
CITED2	0.363625	4.16196e-17	2.34364e-15	498	501
CIT	-0.25127	1.18499e-08	1.99346e-07	498	501
CIZ1	-0.180522	4.82434e-05	0.000305846	498	501
CKAP2	-0.251392	1.16524e-08	1.96352e-07	498	501
CKAP5	-0.234528	1.09281e-07	1.4884e-06	498	501
CKMT2	0.279505	1.91659e-10	4.59227e-09	498	475
CKS1B	-0.16776	0.000161713	0.000881009	498	501
CLCF1	0.192011	1.50885e-05	0.000112259	498	501
CLCN2	-0.227434	2.66781e-07	3.2662e-06	498	501
CLDN10	0.24362	3.33734e-08	5.0444e-07	498	492
CLDN18	0.599339	3.54455e-50	1.16813e-47	498	497
CLDN23	0.2742	4.31639e-10	9.74972e-09	498	501
CLDN2	0.600325	2.23186e-50	7.47785e-48	498	498
CLDN5	0.441702	2.43508e-25	2.54961e-23	498	501
CLDN9	0.176885	6.86925e-05	0.000418589	498	485
CLEC10A	0.304082	3.53478e-12	1.10341e-10	498	501
CLEC14A	0.448478	3.67319e-26	4.05726e-24	498	501
CLEC3B	0.5204	4.09137e-36	7.75933e-34	498	501
CLEC4A	0.214539	1.25602e-06	1.29353e-05	498	501
CLEC4C	0.260622	3.18849e-09	6.03562e-08	498	336
CLEC4D	0.20187	5.26021e-06	4.53068e-05	498	478
CLEC4E	0.180966	4.61844e-05	0.000294745	498	501
CLEC4G	0.17004	0.000131098	0.000736574	498	468
CLEC4M	0.253545	8.65268e-09	1.48544e-07	498	343
CLEC5A	0.193063	1.35176e-05	0.000102275	498	501
CLEC7A	0.207311	2.87459e-06	2.7029e-05	498	501
CLEC9A	0.30202	5.01593e-12	1.53947e-10	498	431
CLECL1	0.218574	7.81316e-07	8.52475e-06	498	493
CLIC1	0.171781	0.000111481	0.000641009	498	501
CLIC2	0.233668	1.21945e-07	1.6343e-06	498	501
CLIC3	0.328601	4.44348e-14	1.83424e-12	498	500
CLIC5	0.514536	3.27178e-35	5.43576e-33	498	501
CLIC6	0.28749	5.46213e-11	1.43913e-09	498	501
CLK2P	-0.21182	1.72074e-06	1.71248e-05	498	501
CLK2	-0.232765	1.36785e-07	1.80669e-06	498	501
CLN5	0.193266	1.32335e-05	0.000100501	498	501
CLSPN	-0.181091	4.56222e-05	0.00029162	498	501
CLSTN2	-0.173811	9.21065e-05	0.000543315	498	500
CLU	0.254408	7.67285e-09	1.32743e-07	498	501
CMA1	0.298832	8.56802e-12	2.54797e-10	498	309
CMAH	0.384627	4.12383e-19	2.76338e-17	498	501
CMKLR1	0.188589	2.14885e-05	0.000152053	498	501
CMPK1	0.202295	5.02059e-06	4.36922e-05	498	501
CMTM2	0.293127	2.19798e-11	6.14548e-10	498	477
CMTM6	0.224313	3.91476e-07	4.57549e-06	498	501
CMTM7	0.270992	6.99401e-10	1.52772e-08	498	501
CMTM8	0.190957	1.68368e-05	0.00012362	498	501
CNDP2	0.248052	1.83941e-08	2.97967e-07	498	501
CNIH2	-0.1756	7.76972e-05	0.000468291	498	501
CNN1	0.210451	2.01334e-06	1.96667e-05	498	501
CNN2	0.23811	6.88749e-08	9.75752e-07	498	501
CNN3	0.235384	9.79324e-08	1.3466e-06	498	501
CNNM1	-0.21482	1.21563e-06	1.25515e-05	498	498
CNR1	0.312458	8.2928e-13	2.83521e-11	498	495
CNR2	0.285174	7.8936e-11	2.03182e-09	498	446
CNRIP1	0.248151	1.81506e-08	2.94496e-07	498	501
CNTN2	-0.167041	0.000172679	0.000931658	498	419
CNTN4	0.170013	0.000131428	0.000738016	498	498
CNTN6	0.55956	1.27855e-42	3.29522e-40	498	370
COBL	0.211794	1.72596e-06	1.71682e-05	498	501
COCH	-0.169007	0.00014422	0.000799005	498	500
COG1	-0.184396	3.28569e-05	0.000220395	498	501
COG2	-0.168364	0.000152999	0.000841514	498	501
COL11A2	-0.188334	2.20559e-05	0.000155794	498	500
COL14A1	0.169796	0.000134089	0.000751487	498	501
COL29A1	0.343817	2.39146e-15	1.16405e-13	498	492
COL4A3	0.48029	2.83269e-30	3.84768e-28	498	498
COL4A4	0.323343	1.17508e-13	4.58692e-12	498	501
COL6A6	0.370886	8.76856e-18	5.21522e-16	498	500
COL8A1	0.200183	6.32288e-06	5.2962e-05	498	501
COL9A1	-0.17748	6.48669e-05	0.000398417	498	371
COLEC12	0.273425	4.85335e-10	1.09135e-08	498	501
COMMD9	0.174837	8.35633e-05	0.000498923	498	501
COPG2	-0.167669	0.000163058	0.000886654	498	501
CORO1A	0.180437	4.86503e-05	0.00030794	498	501
COTL1	0.220428	6.26268e-07	6.98273e-06	498	501
COX4I2	0.437337	8.05624e-25	8.12416e-23	498	501
COX6C	-0.18388	3.45996e-05	0.000230469	498	501
COX7A1	0.174375	8.73124e-05	0.000518465	498	501
CPA3	0.366063	2.47829e-17	1.43576e-15	498	500
CPAMD8	0.257116	5.24833e-09	9.39512e-08	498	501
CPB1	0.17665	7.02615e-05	0.000427114	498	287
CPB2	0.429839	6.04152e-24	5.7289e-22	498	407
CPEB2	0.182947	3.79705e-05	0.000249207	498	501
CPEB4	0.179446	5.36001e-05	0.000335991	498	501
CPM	0.379939	1.1895e-18	7.47268e-17	498	501
CPNE8	0.202636	4.8356e-06	4.23389e-05	498	501
CPSF3	-0.194659	1.14281e-05	8.82934e-05	498	501
CPSF6	-0.308851	1.5571e-12	5.13997e-11	498	501
CPVL	0.250419	1.33188e-08	2.2183e-07	498	501
CPZ	0.182506	3.96702e-05	0.00025901	498	501
CP	0.479205	3.97857e-30	5.36786e-28	498	501
CR1	0.382514	6.66279e-19	4.30682e-17	498	501
CR2	0.176198	7.33762e-05	0.000444301	498	493
CRABP1	-0.217238	9.15171e-07	9.786e-06	498	456
CREB3L1	0.32899	4.13206e-14	1.71272e-12	498	501
CRELD1	0.176386	7.20688e-05	0.000437044	498	501
CRLF1	0.211723	1.74016e-06	1.72923e-05	498	501
CRLF2	0.203974	4.17182e-06	3.7307e-05	498	277
CRNKL1	-0.181135	4.54239e-05	0.000290536	498	501
CRTAC1	0.690032	4.53215e-72	2.6797e-69	498	496
CRTC2	-0.219093	7.3451e-07	8.05557e-06	498	501
CRY2	0.216597	9.87092e-07	1.04385e-05	498	501
CRYBB1	0.224234	3.95282e-07	4.60925e-06	498	478
CRYBB3	-0.166431	0.000182516	0.000978172	498	470
CRYBG3	0.171018	0.000119713	0.000680985	498	501
CRYM	0.29989	7.17885e-12	2.15076e-10	498	489
CRYZ	0.192855	1.38165e-05	0.000104106	498	501
CSDC2	0.259026	4.00401e-09	7.34422e-08	498	498
CSF1R	0.229674	2.01879e-07	2.55322e-06	498	501
CSF1	0.176627	7.04201e-05	0.000427949	498	501
CSF2RA	0.217172	9.22362e-07	9.84718e-06	498	501
CSF2RB	0.192691	1.40546e-05	0.000105661	498	501
CSF2	0.220398	6.28533e-07	7.00022e-06	498	471
CSF3R	0.572356	6.13334e-45	1.71248e-42	498	501
CSF3	0.393598	5.1771e-20	3.66462e-18	498	486
CSPG5	0.318526	2.81772e-13	1.04126e-11	498	501
CSRNP1	0.336271	1.03941e-14	4.66413e-13	498	501
CST1	-0.171368	0.000115867	0.000662645	498	492
CST4	-0.24404	3.15579e-08	4.81521e-07	498	458
CST5	0.361448	6.58781e-17	3.64834e-15	498	309
CST6	0.36521	2.97288e-17	1.69303e-15	498	497
CST7	0.182898	3.81545e-05	0.000250251	498	501
CSTF3	-0.172493	0.000104285	0.000604335	498	501
CTBS	0.231349	1.6359e-07	2.12034e-06	498	501
CTSA	0.195864	1.00582e-05	7.90773e-05	498	501
CTSB	0.263074	2.24075e-09	4.37762e-08	498	501
CTSC	0.190746	1.72078e-05	0.000126067	498	501
CTSD	0.324205	1.0033e-13	3.96254e-12	498	501
CTSE	0.809308	2.1709e-117	8.72833e-114	498	491
CTSG	0.371136	8.30575e-18	4.95461e-16	498	478
CTSH	0.416166	2.09659e-22	1.7635e-20	498	501
CTSL1	0.205549	3.50188e-06	3.21306e-05	498	501
CTSO	0.205285	3.6064e-06	3.29364e-05	498	501
CTSS	0.25552	6.56807e-09	1.15143e-07	498	501
CTSZ	0.19183	1.5377e-05	0.000114026	498	501
CWC22	-0.201094	5.72593e-06	4.86922e-05	498	501
CX3CR1	0.268046	1.08341e-09	2.26128e-08	498	501
CXCL16	0.301979	5.0501e-12	1.54759e-10	498	501
CXCL17	0.545903	2.97198e-40	6.94717e-38	498	501
CXCL1	0.270987	6.99909e-10	1.52772e-08	498	501
CXCL2	0.62839	2.10731e-56	8.14677e-54	498	501
CXCL3	0.410189	9.39893e-22	7.46825e-20	498	498
CXCL5	0.223833	4.15094e-07	4.80682e-06	498	501
CXCL6	0.178758	5.73115e-05	0.000356146	498	497
CXCR1	0.339137	5.97782e-15	2.78038e-13	498	490
CXCR2	0.259441	3.77449e-09	7.0193e-08	498	501
CXCR4	0.185068	3.07172e-05	0.000208406	498	501
CXCR5	0.241742	4.28035e-08	6.33094e-07	498	501
CXorf21	0.266504	1.35945e-09	2.77171e-08	498	501
CXorf36	0.318098	3.04303e-13	1.11024e-11	498	501
CXorf41	0.242009	4.13206e-08	6.13038e-07	498	269
CYB561D2	0.24941	1.52912e-08	2.52172e-07	498	501
CYB5A	0.419967	7.94949e-23	6.91812e-21	498	501
CYB5R1	0.19265	1.4116e-05	0.000106006	498	501
CYBASC3	0.169335	0.000139926	0.000778126	498	501
CYBA	0.234802	1.05515e-07	1.44102e-06	498	501
CYBB	0.241077	4.67285e-08	6.83685e-07	498	501
CYFIP2	0.173101	9.84869e-05	0.000575819	498	501
CYP17A1	0.427806	1.03445e-23	9.58318e-22	498	354
CYP19A1	0.168947	0.000145014	0.000802867	498	497
CYP1A2	0.172071	0.000108494	0.000624763	498	161
CYP1B1	0.321451	1.65986e-13	6.31972e-12	498	501
CYP21A2	0.328147	4.8369e-14	1.98847e-12	498	498
CYP24A1	0.25461	7.4593e-09	1.2916e-07	498	499
CYP26A1	-0.176992	6.79888e-05	0.000415308	498	485
CYP27A1	0.302484	4.63685e-12	1.42967e-10	498	501
CYP27B1	0.170948	0.00012049	0.000685208	498	501
CYP2B6	0.16938	0.000139341	0.000775733	498	272
CYP2B7P1	0.649447	2.40445e-61	1.12411e-58	498	496
CYP2W1	-0.171292	0.000116699	0.000666099	498	463
CYP39A1	0.26804	1.08435e-09	2.26128e-08	498	500
CYP4B1	0.535376	1.67635e-38	3.70327e-36	498	494
CYP7B1	0.181973	4.18195e-05	0.000270931	498	501
CYR61	0.205333	3.58734e-06	3.28249e-05	498	501
CYSLTR1	0.35607	2.0182e-16	1.07333e-14	498	501
CYTH4	0.206065	3.30592e-06	3.06263e-05	498	501
CYTIP	0.232088	1.49021e-07	1.95164e-06	498	501
CYYR1	0.237926	7.05416e-08	9.96555e-07	498	501
DAB2	0.221419	5.55966e-07	6.26139e-06	498	501
DACT3	0.207062	2.95614e-06	2.76406e-05	498	501
DALRD3	0.168157	0.000155929	0.000854359	498	501
DAND5	-0.215684	1.0988e-06	1.14749e-05	498	440
DAPP1	0.185983	2.80099e-05	0.000192376	498	501
DAP	0.19383	1.24718e-05	9.54037e-05	498	501
DARC	0.432993	2.60431e-24	2.51704e-22	498	500
DARS2	-0.187439	2.41646e-05	0.000168908	498	501
DAZAP1	-0.212881	1.5226e-06	1.53891e-05	498	501
DBC1	0.219449	7.04021e-07	7.75466e-06	498	465
DBF4B	-0.301966	5.06167e-12	1.54837e-10	498	501
DBNL	0.201399	5.53836e-06	4.73173e-05	498	501
DCAF15	-0.234355	1.11717e-07	1.51293e-06	498	501
DCAF8	-0.173092	9.85754e-05	0.000575897	498	501
DCBLD1	0.22606	3.1607e-07	3.79794e-06	498	501
DCDC2B	0.190738	1.72224e-05	0.000126128	498	334
DCDC2	0.394015	4.69357e-20	3.33409e-18	498	495
DCLK1	0.199186	7.04475e-06	5.80625e-05	498	501
DCST2	-0.181847	4.23438e-05	0.000273798	498	497
DCUN1D3	0.201183	5.67043e-06	4.8302e-05	498	501
DDAH1	0.280666	1.60064e-10	3.88619e-09	498	501
DDIT4L	0.297116	1.13991e-11	3.32592e-10	498	500
DDX11	-0.203542	4.37607e-06	3.89429e-05	498	501
DDX12	-0.21724	9.14952e-07	9.786e-06	498	501
DDX31	-0.207959	2.67194e-06	2.52891e-05	498	501
DDX39	-0.240694	4.91387e-08	7.16341e-07	498	501
DDX42	-0.187288	2.45406e-05	0.00017118	498	501
DDX49	-0.218152	8.21371e-07	8.90616e-06	498	501
DDX52	-0.174994	8.23247e-05	0.000492845	498	501
DDX55	-0.213761	1.37504e-06	1.4046e-05	498	501
DEDD	-0.167055	0.000172449	0.000930917	498	501
DEFA1B	0.29373	1.99147e-11	5.62281e-10	498	342
DEFA4	0.218947	7.47431e-07	8.18388e-06	498	104
DEFB4A	0.329928	3.46598e-14	1.45767e-12	498	377
DEK	-0.188087	2.26211e-05	0.000159562	498	501
DENND1A	-0.185535	2.93065e-05	0.000200051	498	501
DENND2A	0.21291	1.51759e-06	1.53461e-05	498	501
DENND2D	0.252535	9.95238e-09	1.69266e-07	498	501
DENND3	0.169488	0.00013796	0.000769536	498	501
DEPDC1B	-0.173095	9.85426e-05	0.000575873	498	501
DES	0.394817	3.88562e-20	2.76995e-18	498	499
DGCR10	-0.171059	0.000119259	0.00067922	498	433
DGCR9	-0.215674	1.10008e-06	1.14822e-05	498	497
DHCR24	0.338265	7.07776e-15	3.2485e-13	498	501
DHDDS	0.199277	6.97552e-06	5.75889e-05	498	501
DHRS11	-0.200837	5.88836e-06	4.98415e-05	498	501
DHRS13	-0.216948	9.47107e-07	1.00739e-05	498	501
DHRS3	0.231054	1.6978e-07	2.1935e-06	498	501
DHRS7	0.227609	2.6104e-07	3.19981e-06	498	501
DHRS9	0.24469	2.89322e-08	4.46716e-07	498	501
DHTKD1	-0.174965	8.25479e-05	0.000494034	498	501
DHX30	-0.214297	1.29198e-06	1.32649e-05	498	501
DHX34	-0.203898	4.20701e-06	3.7602e-05	498	501
DHX35	-0.170317	0.00012777	0.000720696	498	501
DHX57	-0.17212	0.000108005	0.000622482	498	501
DHX8	-0.175585	7.7814e-05	0.000468632	498	501
DHX9	-0.244728	2.87859e-08	4.44799e-07	498	501
DIAPH3	-0.252443	1.00793e-08	1.7128e-07	498	501
DIO1	0.207434	2.83502e-06	2.66765e-05	498	441
DISP1	0.181761	4.27045e-05	0.000275864	498	501
DKFZp779M0652	0.171476	0.000114702	0.000657399	498	455
DKK2	0.274376	4.20285e-10	9.52536e-09	498	500
DLC1	0.407338	1.90216e-21	1.4651e-19	498	501
DLEU2	-0.190577	1.75123e-05	0.000127878	498	501
DLG2	0.316148	4.3139e-13	1.5268e-11	498	500
DLL3	-0.212818	1.53373e-06	1.5486e-05	498	487
DLL4	0.319649	2.30133e-13	8.58325e-12	498	501
DLX1	-0.195133	1.08689e-05	8.45249e-05	498	476
DLX4	-0.18182	4.24569e-05	0.000274441	498	501
DLX5	-0.209822	2.16297e-06	2.1016e-05	498	501
DLX6AS	-0.192746	1.39737e-05	0.000105211	498	476
DLX6	-0.223657	4.24071e-07	4.89105e-06	498	489
DMBT1	0.783193	4.81425e-105	9.67808e-102	498	500
DMRTA1	0.179286	5.44412e-05	0.000340308	498	486
DNA2	-0.296154	1.33673e-11	3.84438e-10	498	501
DNAH12	0.193855	1.24397e-05	9.52308e-05	498	437
DNAH14	-0.180442	4.86267e-05	0.000307888	498	500
DNAH5	0.271151	6.83004e-10	1.49896e-08	498	500
DNAH7	0.232577	1.40071e-07	1.84525e-06	498	497
DNAI2	0.196491	9.4088e-06	7.48496e-05	498	424
DNAJB13	0.218306	8.06582e-07	8.76471e-06	498	480
DNAJB9	0.213645	1.39361e-06	1.41995e-05	498	501
DNAJC1	0.177955	6.19545e-05	0.000381812	498	501
DNAJC2	-0.199908	6.51445e-06	5.42502e-05	498	501
DNAJC5B	0.307215	2.06621e-12	6.67797e-11	498	495
DNAJC7	-0.171493	0.000114522	0.000656842	498	501
DNAJC9	-0.1995	6.80905e-06	5.63766e-05	498	501
DNALI1	0.380034	1.16444e-18	7.33814e-17	498	501
DNASE2B	0.262459	2.44893e-09	4.75661e-08	498	439
DNM1P35	-0.233334	1.2724e-07	1.69848e-06	498	501
DNMT1	-0.252976	9.36329e-09	1.59924e-07	498	501
DNMT3A	-0.199634	6.71131e-06	5.5682e-05	498	501
DNMT3B	-0.283413	1.04204e-10	2.60224e-09	498	501
DOC2A	-0.202246	5.04762e-06	4.38514e-05	498	495
DOCK2	0.248582	1.71162e-08	2.78838e-07	498	501
DOCK4	0.231339	1.63791e-07	2.12158e-06	498	501
DOCK5	0.172082	0.000108386	0.000624321	498	501
DOCK8	0.241796	4.25009e-08	6.29158e-07	498	501
DOK2	0.255338	6.73813e-09	1.17584e-07	498	501
DOK3	0.241246	4.5697e-08	6.70545e-07	498	501
DONSON	-0.18792	2.30103e-05	0.000161853	498	501
DPCR1	0.642529	1.11571e-59	4.67272e-57	498	433
DPEP1	0.178601	5.81956e-05	0.00036086	498	491
DPEP2	0.329997	3.42184e-14	1.44212e-12	498	501
DPH3	0.169093	0.000143087	0.000794166	498	501
DPP4	0.465025	3.01739e-28	3.79117e-26	498	501
DPY19L2P1	-0.200941	5.82195e-06	4.94251e-05	498	481
DPY19L2	-0.204985	3.72916e-06	3.39089e-05	498	500
DPYD	0.413692	3.91547e-22	3.22593e-20	498	501
DPYSL2	0.217521	8.85115e-07	9.52031e-06	498	501
DPYS	0.199182	7.04733e-06	5.80625e-05	498	436
DRAM1	0.483373	1.07202e-30	1.48627e-28	498	501
DRAM2	0.184932	3.11371e-05	0.000210899	498	501
DRGX	0.200738	5.95235e-06	5.02562e-05	498	169
DSCC1	-0.228165	2.43664e-07	3.00883e-06	498	501
DSCR6	-0.251092	1.21445e-08	2.03961e-07	498	496
DSCR9	-0.21119	1.84993e-06	1.8239e-05	498	486
DSN1	-0.193189	1.33405e-05	0.000101125	498	501
DSTN	0.173266	9.69697e-05	0.00056883	498	501
DSTYK	-0.167133	0.000171233	0.000924601	498	501
DTHD1	0.182592	3.93324e-05	0.000257138	498	485
DTL	-0.246559	2.25125e-08	3.57761e-07	498	501
DTX3	-0.222342	4.97377e-07	5.67249e-06	498	501
DTX4	0.271125	6.8561e-10	1.5014e-08	498	501
DUOX1	0.206056	3.30913e-06	3.06419e-05	498	501
DUOXA1	0.188716	2.12107e-05	0.000150511	498	501
DUOXA2	0.170818	0.00012196	0.000691223	498	497
DUSP12	-0.173716	9.29312e-05	0.000547537	498	501
DUSP1	0.263558	2.08911e-09	4.10531e-08	498	501
DUSP5P	-0.181744	4.27777e-05	0.000276248	498	499
DUSP6	0.242498	3.8734e-08	5.78937e-07	498	501
DVL2	-0.183179	3.71024e-05	0.000244387	498	501
DVL3	-0.169253	0.000140982	0.000783566	498	501
DVWA	-0.17821	6.0444e-05	0.000373534	498	477
DYRK3	0.218322	8.05052e-07	8.75282e-06	498	501
DYSF	0.234776	1.05871e-07	1.44489e-06	498	501
E2F1	-0.262534	2.42247e-09	4.70975e-08	498	501
E2F2	-0.205713	3.43851e-06	3.16214e-05	498	501
E2F6	-0.1745	8.62834e-05	0.00051303	498	501
E2F7	-0.180603	4.78642e-05	0.000304113	498	501
E2F8	-0.186335	2.70309e-05	0.000186416	498	501
EAF2	0.173119	9.83252e-05	0.000575104	498	501
EBF3	-0.308775	1.57776e-12	5.19963e-11	498	474
EBI3	0.167866	0.000160148	0.000874379	498	501
ECEL1	-0.20175	5.32953e-06	4.58449e-05	498	490
ECHDC1	0.291611	2.81298e-11	7.74649e-10	498	501
ECHDC3	0.193238	1.32717e-05	0.000100718	498	501
ECSCR	0.349945	7.03988e-16	3.63812e-14	498	501
ECSIT	-0.173451	9.52889e-05	0.000559788	498	501
ECT2	-0.200796	5.91501e-06	5.00461e-05	498	501
EDA2R	0.228694	2.28138e-07	2.82928e-06	498	501
EDA	0.178893	5.6567e-05	0.000352064	498	501
EDEM1	0.259246	3.88055e-09	7.1701e-08	498	501
EDN1	0.209947	2.13249e-06	2.07299e-05	498	501
EDNRA	0.203155	4.56719e-06	4.03757e-05	498	501
EDNRB	0.402592	6.05936e-21	4.56222e-19	498	501
EFCAB4A	0.19204	1.50444e-05	0.000112014	498	501
EFEMP1	0.301958	5.06803e-12	1.54837e-10	498	501
EFHD2	0.172653	0.000102735	0.000596211	498	501
EFNA5	0.201236	5.63765e-06	4.80732e-05	498	501
EFS	-0.182017	4.16359e-05	0.000270002	498	501
EHD1	0.229849	1.97499e-07	2.50652e-06	498	501
EHD2	0.22412	4.00796e-07	4.66003e-06	498	501
EHD4	0.293672	2.01037e-11	5.66822e-10	498	501
EIF2AK2	-0.168818	0.000146747	0.000809785	498	501
EIF4E2	0.215095	1.1772e-06	1.21986e-05	498	501
ELANE	0.316485	4.0619e-13	1.44269e-11	498	307
ELAVL1	-0.220415	6.27225e-07	6.98952e-06	498	501
ELAVL3	-0.182408	4.00562e-05	0.000261238	498	289
ELF5	0.172308	0.000106113	0.000612985	498	495
ELFN2	0.243566	3.36134e-08	5.07685e-07	498	491
ELK3	0.190365	1.78996e-05	0.000130375	498	501
ELL2	0.290396	3.42487e-11	9.32929e-10	498	501
ELN	0.245071	2.74949e-08	4.27149e-07	498	501
ELOVL7	-0.183273	3.67578e-05	0.000242754	498	501
ELP2P	-0.210061	2.10506e-06	2.0493e-05	498	499
ELTD1	0.2206	6.13446e-07	6.85497e-06	498	501
EMB	0.228993	2.19797e-07	2.74121e-06	498	501
EMCN	0.447812	4.43117e-26	4.84129e-24	498	501
EME1	-0.276698	2.95158e-10	6.80454e-09	498	501
EMP1	0.174942	8.27293e-05	0.000494972	498	501
EMR2	0.210202	2.07142e-06	2.02047e-05	498	501
EMR3	0.336626	9.70904e-15	4.36646e-13	498	466
EMR4P	0.246527	2.26094e-08	3.59018e-07	498	486
EMX1	-0.193675	1.26768e-05	9.66774e-05	498	458
EMX2OS	-0.265203	1.64444e-09	3.31245e-08	498	329
EMX2	-0.238866	6.24192e-08	8.91202e-07	498	298
ENAM	0.258635	4.23287e-09	7.72873e-08	498	359
ENC1	0.212846	1.52874e-06	1.54433e-05	498	501
ENDOD1	0.210817	1.93074e-06	1.89612e-05	498	501
ENG	0.169419	0.000138846	0.000774051	498	501
ENKUR	0.213639	1.39457e-06	1.42021e-05	498	497
ENO3	-0.197865	8.12195e-06	6.58369e-05	498	501
ENPP1	-0.22604	3.16855e-07	3.80283e-06	498	501
ENPP2	0.330696	3.00008e-14	1.27507e-12	498	501
ENPP4	0.228277	2.40289e-07	2.97263e-06	498	501
ENPP5	0.225027	3.58779e-07	4.25518e-06	498	501
EP400	-0.198202	7.83277e-06	6.37499e-05	498	501
EPAS1	0.29837	9.25532e-12	2.73617e-10	498	501
EPHA10	0.209367	2.27812e-06	2.19544e-05	498	496
EPHX3	0.169784	0.00013424	0.000751644	498	501
EPS15L1	-0.224279	3.93124e-07	4.58675e-06	498	501
EPS8	0.16818	0.000155612	0.000853087	498	501
ERAL1	-0.245488	2.6e-08	4.0509e-07	498	501
ERBB4	0.477041	7.80489e-30	1.03908e-27	498	471
ERCC6L	-0.185574	2.91906e-05	0.000199394	498	501
EREG	0.264302	1.87505e-09	3.73578e-08	498	492
ERG	0.322811	1.29537e-13	5.04667e-12	498	501
ERN2	0.296898	1.18188e-11	3.4384e-10	498	481
ERP27	0.327899	5.06529e-14	2.07388e-12	498	501
ERRFI1	0.18472	3.18079e-05	0.000214431	498	501
ERVFRDE1	0.195934	9.98305e-06	7.85169e-05	498	450
ESAM	0.449265	2.94028e-26	3.26566e-24	498	501
ESCO1	-0.207972	2.668e-06	2.52756e-05	498	501
ESPL1	-0.34352	2.53598e-15	1.22897e-13	498	501
ESR1	0.168297	0.000153953	0.000845838	498	501
ESYT3	0.187518	2.39715e-05	0.000167734	498	500
ETAA1	-0.176908	6.85423e-05	0.000417927	498	501
ETHE1	0.187559	2.38715e-05	0.000167209	498	501
ETS1	0.196417	9.48343e-06	7.53242e-05	498	501
ETS2	0.183788	3.49169e-05	0.000232275	498	501
ETV1	0.264293	1.87747e-09	3.73691e-08	498	501
EVI2A	0.266433	1.3736e-09	2.79488e-08	498	501
EVI2B	0.26796	1.09725e-09	2.28343e-08	498	501
EXO1	-0.220131	6.48886e-07	7.20296e-06	498	501
EXOSC2	-0.205009	3.71935e-06	3.3848e-05	498	501
EXOSC9	-0.168833	0.000146545	0.000809338	498	501
EZH2	-0.29153	2.85029e-11	7.82778e-10	498	501
EZR	0.190295	1.80298e-05	0.000131086	498	501
F10	0.274663	4.02376e-10	9.15042e-09	498	499
F11	0.567782	4.24923e-44	1.15436e-41	498	347
F13A1	0.186113	2.76441e-05	0.000190123	498	501
F2RL3	0.305747	2.65959e-12	8.40655e-11	498	501
F3	0.310196	1.23229e-12	4.10145e-11	498	501
F5	0.219344	7.1292e-07	7.83588e-06	498	500
F8	0.233187	1.29645e-07	1.72714e-06	498	501
FABP3	0.204631	3.87899e-06	3.50942e-05	498	501
FABP4	0.288109	4.94696e-11	1.3172e-09	498	493
FAIM3	0.301086	5.87121e-12	1.78023e-10	498	501
FAM105A	0.204471	3.94816e-06	3.55501e-05	498	501
FAM107A	0.384675	4.07989e-19	2.74308e-17	498	501
FAM107B	0.261469	2.82376e-09	5.41144e-08	498	501
FAM113B	0.173042	9.90376e-05	0.00057811	498	501
FAM114A1	0.199358	6.9149e-06	5.71588e-05	498	501
FAM118B	0.232362	1.43941e-07	1.89004e-06	498	501
FAM122B	-0.168862	0.000146164	0.000808347	498	501
FAM123B	-0.208603	2.4844e-06	2.37942e-05	498	501
FAM124B	0.300351	6.64382e-12	1.99642e-10	498	499
FAM128A	-0.184889	3.12746e-05	0.000211688	498	501
FAM129C	0.177509	6.46827e-05	0.00039765	498	483
FAM136A	-0.229285	2.11921e-07	2.65933e-06	498	501
FAM161A	-0.203376	4.45693e-06	3.9575e-05	498	501
FAM162B	0.410016	9.81001e-22	7.73375e-20	498	500
FAM167B	0.203581	4.35716e-06	3.87918e-05	498	501
FAM171A1	-0.16751	0.000165446	0.000896967	498	501
FAM176A	0.298518	9.0292e-12	2.6772e-10	498	501
FAM177B	0.2688	9.69052e-10	2.04846e-08	498	412
FAM181A	0.318119	3.03158e-13	1.10807e-11	498	456
FAM183A	0.216763	9.67905e-07	1.0268e-05	498	487
FAM189A2	0.185293	3.00292e-05	0.000204344	498	498
FAM189B	-0.252613	9.84594e-09	1.67598e-07	498	501
FAM20A	0.485401	5.62812e-31	7.96776e-29	498	501
FAM23A	0.269761	8.40253e-10	1.79889e-08	498	501
FAM36A	-0.16921	0.000141548	0.000786279	498	501
FAM38B	0.228563	2.31882e-07	2.87216e-06	498	501
FAM46A	0.227688	2.58509e-07	3.17265e-06	498	501
FAM46B	0.202083	5.13836e-06	4.45052e-05	498	501
FAM46C	0.306512	2.33228e-12	7.41863e-11	498	501
FAM47E	0.269197	9.13685e-10	1.94368e-08	498	500
FAM57B	-0.217618	8.75068e-07	9.42739e-06	498	453
FAM64A	-0.18251	3.96526e-05	0.000258979	498	501
FAM65B	0.270344	7.70465e-10	1.66904e-08	498	501
FAM70B	0.194723	1.13508e-05	8.78651e-05	498	501
FAM71D	-0.20817	2.60919e-06	2.48078e-05	498	501
FAM72A	-0.248359	1.76435e-08	2.86731e-07	498	501
FAM72B	-0.241323	4.524e-08	6.64323e-07	498	501
FAM72D	-0.25057	1.30463e-08	2.17832e-07	498	501
FAM81B	0.318374	2.89558e-13	1.06796e-11	498	440
FAM82A1	0.169814	0.000133867	0.000750662	498	501
FAM82A2	0.249625	1.4848e-08	2.45467e-07	498	501
FAM83A	0.195111	1.08944e-05	8.46579e-05	498	500
FAM83E	0.274959	3.84748e-10	8.75944e-09	498	501
FAM92B	0.268276	1.04725e-09	2.19073e-08	498	478
FANCA	-0.184548	3.23603e-05	0.000217775	498	501
FANCB	-0.224511	3.82131e-07	4.49238e-06	498	501
FANCC	-0.215322	1.1463e-06	1.19153e-05	498	501
FANCD2	-0.180593	4.79112e-05	0.00030422	498	501
FANCG	-0.183516	3.58798e-05	0.000237814	498	501
FANCI	-0.220549	6.17197e-07	6.88923e-06	498	501
FANCL	-0.268686	9.85623e-10	2.07912e-08	498	501
FARSA	-0.179311	5.43085e-05	0.000339796	498	501
FAS	0.171676	0.000112582	0.000646454	498	501
FAT4	0.296873	1.18685e-11	3.44788e-10	498	501
FBF1	-0.244998	2.77649e-08	4.30677e-07	498	501
FBN2	-0.166188	0.000186586	0.000996797	498	501
FBP1	0.414671	3.06034e-22	2.54223e-20	498	501
FBRSL1	-0.181349	4.44749e-05	0.000285466	498	501
FBXL19	-0.174862	8.33634e-05	0.000497877	498	501
FBXL20	-0.179681	5.23844e-05	0.000328883	498	501
FBXL5	0.258331	4.41956e-09	8.05497e-08	498	501
FBXO2	0.168382	0.000152753	0.000840621	498	501
FBXO32	0.174565	8.57482e-05	0.000510755	498	501
FBXO36	0.184157	3.36556e-05	0.000225226	498	501
FBXO41	-0.249137	1.58705e-08	2.6087e-07	498	501
FBXO43	-0.277142	2.75757e-10	6.42357e-09	498	501
FCAR	0.233792	1.20045e-07	1.61206e-06	498	483
FCER1A	0.344972	1.9032e-15	9.35453e-14	498	494
FCER1G	0.242002	4.13598e-08	6.13168e-07	498	501
FCER2	0.243707	3.29883e-08	4.98994e-07	498	459
FCGR1A	0.211656	1.75353e-06	1.73995e-05	498	501
FCGR1B	0.222186	5.06864e-07	5.75677e-06	498	501
FCGR1C	0.225731	3.29101e-07	3.93103e-06	498	501
FCGR2A	0.269972	8.14293e-10	1.75453e-08	498	501
FCGR2B	0.29795	9.92579e-12	2.9215e-10	498	501
FCGR2C	0.277312	2.68633e-10	6.27944e-09	498	501
FCGR3A	0.213673	1.38922e-06	1.41628e-05	498	501
FCGR3B	0.301206	5.75389e-12	1.74729e-10	498	498
FCGRT	0.229347	2.10293e-07	2.6422e-06	498	501
FCHO2	0.234674	1.07255e-07	1.46179e-06	498	501
FCN1	0.335712	1.1572e-14	5.13535e-13	498	499
FCN2	0.27997	1.78343e-10	4.29369e-09	498	187
FCN3	0.518336	8.54417e-36	1.52003e-33	498	501
FCRL1	0.280582	1.62167e-10	3.9325e-09	498	473
FCRL2	0.260129	3.42183e-09	6.4109e-08	498	489
FCRL4	0.278681	2.17645e-10	5.16567e-09	498	446
FCRL5	0.239314	5.88773e-08	8.47252e-07	498	499
FCRL6	0.205282	3.60772e-06	3.29364e-05	498	495
FCRLA	0.186572	2.63907e-05	0.000182627	498	501
FDX1	0.16734	0.000168029	0.000909744	498	501
FEN1	-0.202472	4.9238e-06	4.29988e-05	498	501
FERMT3	0.2093	2.29552e-06	2.2101e-05	498	501
FES	0.196638	9.26189e-06	7.38563e-05	498	501
FEZ1	0.170044	0.000131042	0.000736574	498	501
FFAR2	0.20798	2.66566e-06	2.52684e-05	498	501
FFAR3	0.242771	3.73563e-08	5.59177e-07	498	464
FGA	0.674072	1.19772e-67	6.01943e-65	498	456
FGB	0.204789	3.81112e-06	3.45424e-05	498	282
FGD1	-0.295047	1.60455e-11	4.5624e-10	498	501
FGD2	0.220183	6.44898e-07	7.1666e-06	498	501
FGD4	0.232847	1.35372e-07	1.79238e-06	498	501
FGF19	-0.167995	0.00015826	0.000865717	498	373
FGF21	-0.173146	9.80705e-05	0.000573948	498	199
FGF7	0.390351	1.10544e-19	7.66299e-18	498	501
FGFBP3	-0.193987	1.22679e-05	9.40231e-05	498	501
FGG	0.753748	4.94163e-93	5.51897e-90	498	460
FGL1	0.309306	1.43885e-12	4.77312e-11	498	358
FGL2	0.18529	3.00371e-05	0.000204344	498	501
FGR	0.351791	4.84542e-16	2.52351e-14	498	501
FHL5	0.462971	5.55654e-28	6.68881e-26	498	499
FHOD1	0.226494	2.99613e-07	3.61749e-06	498	501
FIGF	0.309251	1.45257e-12	4.8107e-11	498	496
FILIP1	0.268302	1.04319e-09	2.18451e-08	498	501
FKBP4	-0.168183	0.000155564	0.000853057	498	501
FKTN	-0.205797	3.40615e-06	3.13828e-05	498	501
FLI1	0.24237	3.93939e-08	5.86619e-07	498	501
FLJ12825	-0.226327	3.05828e-07	3.68368e-06	498	476
FLJ16779	0.205849	3.38644e-06	3.12426e-05	498	479
FLJ37201	-0.255799	6.31665e-09	1.11097e-07	498	499
FLJ42709	0.189274	2.00305e-05	0.000143249	498	501
FLJ42875	0.307695	1.90182e-12	6.19648e-11	498	471
FLOT1	0.191432	1.60265e-05	0.000118362	498	501
FLRT1	-0.218101	8.26407e-07	8.95111e-06	498	498
FLRT3	0.560231	9.71683e-43	2.53685e-40	498	500
FLT1	0.195378	1.05908e-05	8.27787e-05	498	501
FLT3	0.23791	7.0686e-08	9.97893e-07	498	490
FLT4	0.26124	2.91851e-09	5.57934e-08	498	501
FLVCR1	-0.175975	7.49607e-05	0.000453077	498	501
FLVCR2	0.263506	2.10483e-09	4.12813e-08	498	501
FMN1	0.257306	5.109e-09	9.17839e-08	498	498
FMO2	0.213153	1.47554e-06	1.49661e-05	498	501
FMO5	0.473199	2.55108e-29	3.30867e-27	498	501
FNDC8	-0.23833	6.69364e-08	9.50298e-07	498	501
FNIP2	0.210328	2.04168e-06	1.99242e-05	498	501
FOLR1	0.702626	9.08719e-76	6.08933e-73	498	487
FOLR2	0.278852	2.11997e-10	5.04353e-09	498	501
FOLR3	0.244372	3.01876e-08	4.63787e-07	498	421
FOSB	0.260607	3.19551e-09	6.04321e-08	498	501
FOXA2	0.530321	1.10557e-37	2.3395e-35	498	485
FOXD3	-0.229621	2.03216e-07	2.56612e-06	498	476
FOXF1	0.196039	9.87272e-06	7.79483e-05	498	501
FOXI3	-0.178784	5.7172e-05	0.000355499	498	413
FOXJ1	0.219104	7.33546e-07	8.04939e-06	498	498
FOXK2	-0.184688	3.19108e-05	0.000215053	498	501
FOXM1	-0.23097	1.71588e-07	2.20976e-06	498	501
FOXN1	-0.188754	2.11295e-05	0.000150094	498	493
FPR1	0.325599	7.76051e-14	3.10158e-12	498	501
FPR2	0.32254	1.36105e-13	5.27191e-12	498	497
FPR3	0.19756	8.39235e-06	6.76741e-05	498	501
FRAT2	-0.22419	3.97383e-07	4.62838e-06	498	501
FRMPD1	-0.195647	1.02925e-05	8.07613e-05	498	429
FRS3	-0.169808	0.000133943	0.000750881	498	501
FRZB	0.18582	2.84754e-05	0.000195172	498	501
FSD1	-0.277103	2.774e-10	6.45437e-09	498	501
FSTL3	0.221581	5.45259e-07	6.1546e-06	498	501
FTL	0.238947	6.17686e-08	8.83642e-07	498	501
FUCA1	0.277881	2.46178e-10	5.80859e-09	498	501
FUCA2	0.264371	1.8565e-09	3.70618e-08	498	501
FUS	-0.233462	1.25192e-07	1.67448e-06	498	501
FUT3	0.222092	5.12616e-07	5.81882e-06	498	501
FUT7	0.171472	0.000114746	0.000657399	498	499
FUT8	0.176258	7.29572e-05	0.000442031	498	501
FXR1	-0.186468	2.667e-05	0.000184306	498	501
FXYD1	0.245904	2.45848e-08	3.86599e-07	498	490
FYB	0.209043	2.36331e-06	2.2721e-05	498	501
FZD4	0.222044	5.15611e-07	5.84951e-06	498	501
FZD5	0.274415	4.17831e-10	9.48044e-09	498	501
FZD9	-0.226576	2.96589e-07	3.5896e-06	498	498
G0S2	0.339867	5.18687e-15	2.44196e-13	498	501
GAB3	0.271997	6.01706e-10	1.33364e-08	498	501
GABARAP	0.244228	3.07731e-08	4.71878e-07	498	501
GABBR1	-0.167195	0.000170274	0.000919918	498	501
GABRB2	0.226899	2.85002e-07	3.46606e-06	498	474
GADD45A	0.174426	8.6894e-05	0.000516203	498	501
GADD45B	0.30668	2.26573e-12	7.25286e-11	498	501
GALC	0.203978	4.16991e-06	3.73065e-05	498	501
GALE	0.243236	3.51193e-08	5.28445e-07	498	501
GALM	0.187229	2.46874e-05	0.000172025	498	501
GALNT10	0.199383	6.89611e-06	5.70269e-05	498	501
GALNT5	0.247933	1.86931e-08	3.0208e-07	498	499
GALNTL6	0.267214	1.22486e-09	2.52806e-08	498	373
GANC	0.217133	9.26572e-07	9.88688e-06	498	501
GAPDHS	-0.197977	8.02444e-06	6.51516e-05	498	463
GAPT	0.376207	2.73086e-18	1.68919e-16	498	500
GAS2L2	0.239766	5.54979e-08	8.01491e-07	498	451
GAS7	0.170619	0.000124244	0.000703177	498	501
GATA1	0.235356	9.82762e-08	1.34949e-06	498	433
GATA5	0.172549	0.000103744	0.000601377	498	465
GATA6	0.348867	8.74756e-16	4.48603e-14	498	501
GATAD2B	-0.223935	4.09938e-07	4.75808e-06	498	501
GBP3	0.187981	2.28667e-05	0.000161012	498	501
GBX2	-0.183264	3.67921e-05	0.000242821	498	444
GCFC1	-0.208	2.6596e-06	2.52317e-05	498	501
GCHFR	0.256727	5.54366e-09	9.87105e-08	498	501
GCKR	0.168825	0.000146664	0.00080955	498	408
GCNT3	0.178195	6.05352e-05	0.000373983	498	500
GCOM1	0.329602	3.68497e-14	1.54331e-12	498	501
GDAP1	-0.173919	9.11638e-05	0.000538544	498	501
GDE1	0.201447	5.50892e-06	4.71259e-05	498	501
GDF10	0.277414	2.64493e-10	6.18988e-09	498	478
GDF15	0.248382	1.75883e-08	2.86065e-07	498	501
GDF5	0.232978	1.33131e-07	1.76772e-06	498	476
GDF9	-0.232449	1.42368e-07	1.87305e-06	498	501
GEFT	-0.215232	1.15851e-06	1.20297e-05	498	501
GEMIN5	-0.168044	0.000157565	0.000862616	498	501
GEN1	-0.221471	5.52498e-07	6.22932e-06	498	501
GFRA2	0.166401	0.000183017	0.000980331	498	501
GGCX	0.190985	1.6787e-05	0.000123299	498	501
GGNBP1	-0.173056	9.89064e-05	0.000577663	498	99
GGNBP2	-0.188814	2.09986e-05	0.000149217	498	501
GGT1	0.266829	1.29602e-09	2.65314e-08	498	501
GGT3P	0.256809	5.48032e-09	9.76693e-08	498	500
GGT5	0.22135	5.60582e-07	6.30985e-06	498	501
GGTA1	0.234521	1.09373e-07	1.48864e-06	498	501
GGTLC1	0.578978	3.52481e-46	1.04205e-43	498	483
GGTLC2	0.269178	9.16241e-10	1.94706e-08	498	501
GIMAP1	0.206552	3.13048e-06	2.91532e-05	498	501
GIMAP2	0.18479	3.15866e-05	0.000213369	498	501
GIMAP4	0.222661	4.78577e-07	5.48014e-06	498	501
GIMAP5	0.260919	3.05572e-09	5.81164e-08	498	501
GIMAP6	0.259295	3.85394e-09	7.14062e-08	498	501
GIMAP7	0.26738	1.19524e-09	2.47455e-08	498	501
GIMAP8	0.298246	9.44847e-12	2.78917e-10	498	501
GINS1	-0.211355	1.81537e-06	1.79686e-05	498	501
GINS3	-0.173042	9.90404e-05	0.00057811	498	501
GIPC2	0.250036	1.40367e-08	2.33014e-07	498	500
GIT1	-0.236014	9.0319e-08	1.25082e-06	498	501
GJA4	0.222542	4.85519e-07	5.55199e-06	498	501
GJA5	0.384154	4.59317e-19	3.04741e-17	498	501
GJB1	0.409265	1.1821e-21	9.28272e-20	498	450
GJC1	-0.200758	5.93959e-06	5.01898e-05	498	501
GK3P	0.196001	9.91228e-06	7.81744e-05	498	501
GKN2	0.651813	6.32126e-62	3.09942e-59	498	368
GK	0.225834	3.24963e-07	3.88853e-06	498	501
GLDN	0.244977	2.78438e-08	4.31568e-07	498	501
GLE1	-0.204477	3.94578e-06	3.55501e-05	498	501
GLI4	-0.209994	2.12104e-06	2.06285e-05	498	501
GLIPR1	0.200851	5.87928e-06	4.98066e-05	498	501
GLIPR2	0.258042	4.60428e-09	8.37126e-08	498	501
GLIS1	-0.167647	0.000163387	0.000887963	498	491
GLIS3	0.24971	1.46776e-08	2.43051e-07	498	501
GLOD5	0.416607	1.87495e-22	1.59712e-20	498	437
GLRX	0.300932	6.02596e-12	1.81892e-10	498	501
GMFG	0.323439	1.15476e-13	4.51637e-12	498	501
GMPPA	0.177908	6.22407e-05	0.000383458	498	501
GMPPB	0.323989	1.04398e-13	4.10707e-12	498	501
GMPS	-0.202586	4.86254e-06	4.25377e-05	498	501
GNA14	0.474643	1.63738e-29	2.16555e-27	498	501
GNAI2	0.195935	9.98294e-06	7.85169e-05	498	501
GNAZ	-0.225883	3.22992e-07	3.86725e-06	498	501
GNG11	0.305037	3.00315e-12	9.41847e-11	498	501
GNG12	0.24709	2.09538e-08	3.36449e-07	498	501
GNG2	0.19504	1.09764e-05	8.52146e-05	498	501
GNG5	0.190561	1.75412e-05	0.000127997	498	501
GNG7	0.254867	7.19627e-09	1.2482e-07	498	501
GNGT2	0.27723	2.72057e-10	6.35211e-09	498	501
GNPTG	0.184721	3.18049e-05	0.000214431	498	501
GNRHR2	-0.187427	2.41947e-05	0.000169001	498	501
GNS	0.169773	0.000134374	0.000751987	498	501
GOLT1A	0.299373	7.82743e-12	2.33811e-10	498	482
GON4L	-0.198548	7.54642e-06	6.15939e-05	498	501
GP9	0.21839	7.98557e-07	8.69632e-06	498	157
GPA33	0.257884	4.70867e-09	8.53548e-08	498	479
GPATCH1	-0.210387	2.02816e-06	1.98019e-05	498	501
GPATCH2	-0.18969	1.91916e-05	0.000138134	498	501
GPATCH8	-0.234436	1.10575e-07	1.50093e-06	498	501
GPC2	-0.22456	3.7986e-07	4.4683e-06	498	501
GPC4	0.209779	2.17362e-06	2.10991e-05	498	501
GPC5	0.189539	1.94921e-05	0.000140019	498	428
GPC6	0.195151	1.08482e-05	8.44261e-05	498	501
GPCPD1	0.269541	8.68166e-10	1.85273e-08	498	501
GPD1L	0.191162	1.64819e-05	0.000121324	498	501
GPD1	0.330216	3.28372e-14	1.38974e-12	498	501
GPIHBP1	0.450679	1.96838e-26	2.19835e-24	498	496
GPM6A	0.388257	1.79465e-19	1.22297e-17	498	468
GPR110	0.368995	1.32051e-17	7.76206e-16	498	498
GPR114	0.269204	9.12772e-10	1.94368e-08	498	501
GPR116	0.574463	2.48977e-45	7.25389e-43	498	501
GPR133	0.337151	8.77634e-15	3.97366e-13	498	501
GPR146	0.298538	8.99975e-12	2.67241e-10	498	501
GPR162	0.171019	0.000119706	0.000680985	498	501
GPR171	0.187766	2.33737e-05	0.000164179	498	501
GPR183	0.278546	2.22229e-10	5.26823e-09	498	501
GPR18	0.20196	5.20827e-06	4.49171e-05	498	501
GPR25	0.171322	0.000116368	0.00066459	498	404
GPR34	0.250846	1.25617e-08	2.10265e-07	498	501
GPR37	0.190125	1.835e-05	0.000133077	498	500
GPR39	0.370527	9.47913e-18	5.62121e-16	498	495
GPR61	-0.189481	1.96083e-05	0.00014063	498	339
GPR65	0.272865	5.2804e-10	1.18078e-08	498	501
GPR77	0.261018	3.01293e-09	5.74113e-08	498	499
GPR82	0.263874	1.99556e-09	3.94073e-08	498	498
GPR83	-0.194592	1.15099e-05	8.87549e-05	498	485
GPR89A	-0.194438	1.16976e-05	8.99609e-05	498	501
GPR97	0.353447	3.45761e-16	1.82437e-14	498	501
GPRC5A	0.454702	6.22278e-27	7.14837e-25	498	501
GPRC5C	0.199951	6.48393e-06	5.40551e-05	498	501
GPRIN1	-0.212799	1.53711e-06	1.55123e-05	498	501
GPRIN2	0.230471	1.82696e-07	2.33933e-06	498	500
GPRIN3	0.264666	1.77853e-09	3.55759e-08	498	501
GPSM3	0.250402	1.33506e-08	2.22174e-07	498	501
GPT2	-0.16703	0.000172855	0.000932107	498	501
GPX1	0.278824	2.12914e-10	5.05935e-09	498	501
GPX3	0.38377	5.01166e-19	3.30326e-17	498	501
GRAMD2	0.236569	8.40844e-08	1.17223e-06	498	501
GRAMD3	0.171402	0.000115503	0.000661338	498	501
GRAPL	0.21746	8.91553e-07	9.57931e-06	498	460
GRAP	0.24555	2.57847e-08	4.02759e-07	498	501
GRIA1	0.228683	2.28444e-07	2.83133e-06	498	459
GRIK5	-0.198132	7.89262e-06	6.4159e-05	498	499
GRIN1	-0.167211	0.000170024	0.000919064	498	490
GRIP2	-0.167981	0.000158473	0.000866411	498	489
GRK5	0.250509	1.31564e-08	2.19307e-07	498	501
GRN	0.189088	2.04174e-05	0.000145609	498	501
GRRP1	0.272239	5.80239e-10	1.29176e-08	498	501
GSC	-0.260527	3.23229e-09	6.10609e-08	498	452
GSTA2	0.166355	0.000183777	0.00098414	498	437
GSTA5	0.194162	1.20433e-05	9.24074e-05	498	82
GSTM5	0.270934	7.05541e-10	1.53834e-08	498	501
GTF2IP1	-0.16705	0.000172536	0.000931137	498	501
GTF2IRD1	-0.287221	5.70169e-11	1.49831e-09	498	501
GTF3C2	-0.173758	9.25672e-05	0.000545712	498	501
GTF3C5	-0.200107	6.375e-06	5.3332e-05	498	501
GTPBP3	-0.284027	9.45958e-11	2.38902e-09	498	501
GTSE1	-0.222791	4.71086e-07	5.40231e-06	498	501
GUCY1A2	0.234108	1.15293e-07	1.55406e-06	498	501
GUCY1B2	-0.202251	5.0448e-06	4.38459e-05	498	471
GVIN1	0.179107	5.53997e-05	0.000345547	498	501
GXYLT2	0.19568	1.02571e-05	8.05327e-05	498	501
GYPC	0.2305	1.82034e-07	2.33233e-06	498	501
GYPE	0.33932	5.76905e-15	2.69084e-13	498	480
H2AFY2	-0.204078	4.12423e-06	3.69636e-05	498	501
H2BFM	-0.263309	2.16582e-09	4.23948e-08	498	319
H2BFWT	-0.228249	2.41133e-07	2.97941e-06	498	361
HABP2	0.597086	1.01407e-49	3.28803e-47	498	474
HAMP	0.300249	6.75918e-12	2.02806e-10	498	491
HAPLN1	-0.374776	3.74518e-18	2.30242e-16	498	492
HAPLN4	-0.174655	8.50214e-05	0.000506876	498	499
HAS2	0.221136	5.75216e-07	6.46009e-06	498	501
HAUS8	-0.260808	3.10469e-09	5.88807e-08	498	501
HAVCR2	0.262083	2.58518e-09	4.9923e-08	498	501
HBA1	0.167597	0.000164139	0.000891327	498	467
HBA2	0.204984	3.72943e-06	3.39089e-05	498	501
HBB	0.217451	8.92488e-07	9.58424e-06	498	500
HBD	0.189601	1.93686e-05	0.000139209	498	338
HCK	0.192939	1.36943e-05	0.000103261	498	501
HCLS1	0.190733	1.72317e-05	0.000126141	498	501
HCN3	-0.363689	4.10649e-17	2.3189e-15	498	501
HCST	0.2244	3.87342e-07	4.54568e-06	498	501
HDC	0.324588	9.35035e-14	3.71482e-12	498	501
HDGFRP2	-0.189184	2.02166e-05	0.000144477	498	501
HEATR1	-0.17706	6.75459e-05	0.000412979	498	501
HEATR6	-0.186361	2.696e-05	0.000185991	498	501
HEATR7B2	0.169569	0.000136935	0.000765308	498	69
HEBP1	0.168164	0.000155841	0.000854107	498	501
HECW2	0.17686	6.88612e-05	0.00041949	498	501
HEG1	0.167943	0.000159028	0.00086897	498	501
HELLS	-0.205285	3.60664e-06	3.29364e-05	498	501
HERPUD1	0.195985	9.92959e-06	7.82496e-05	498	501
HES6	-0.205945	3.3504e-06	3.09616e-05	498	501
HEXA	0.250006	1.4095e-08	2.33789e-07	498	501
HEXB	0.207084	2.94878e-06	2.7585e-05	498	501
HGD	0.212093	1.6675e-06	1.66279e-05	498	451
HGF	0.296565	1.24897e-11	3.60747e-10	498	501
HHIP	0.496732	1.41694e-32	2.20813e-30	498	488
HHLA2	0.199068	7.13486e-06	5.86874e-05	498	489
HHLA3	0.173677	9.32829e-05	0.000549448	498	501
HIC1	0.20246	4.93031e-06	4.30182e-05	498	501
HIGD1B	0.468688	1.00566e-28	1.29594e-26	498	499
HIRIP3	-0.178026	6.15326e-05	0.000379329	498	501
HIST1H4E	-0.178628	5.80424e-05	0.000360021	498	493
HIST2H3C	-0.200139	6.35316e-06	5.31935e-05	498	493
HJURP	-0.210707	1.95526e-06	1.91833e-05	498	501
HK3	0.229982	1.94252e-07	2.46842e-06	498	501
HKDC1	0.397846	1.89498e-20	1.40054e-18	498	498
HLA-DMA	0.39119	9.09418e-20	6.32596e-18	498	501
HLA-DMB	0.312721	7.91747e-13	2.7301e-11	498	501
HLA-DOA	0.418321	1.21177e-22	1.04551e-20	498	501
HLA-DOB	0.259203	3.90484e-09	7.20174e-08	498	501
HLA-DPA1	0.30863	1.61794e-12	5.3233e-11	498	501
HLA-DPB1	0.344798	1.97008e-15	9.65965e-14	498	501
HLA-DPB2	0.188823	2.09803e-05	0.00014914	498	480
HLA-DQA2	0.239211	5.96716e-08	8.56229e-07	498	501
HLA-DQB1	0.212229	1.64159e-06	1.64265e-05	498	501
HLA-DQB2	0.248046	1.84091e-08	2.97969e-07	498	501
HLA-DRA	0.312594	8.09681e-13	2.77765e-11	498	501
HLA-DRB1	0.26852	1.01012e-09	2.12634e-08	498	501
HLA-DRB5	0.236833	8.1264e-08	1.13527e-06	498	501
HLA-DRB6	0.315722	4.65398e-13	1.63851e-11	498	497
HLA-E	0.255648	6.45107e-09	1.13362e-07	498	501
HLA-G	0.170927	0.000120737	0.000685835	498	501
HM13	0.166981	0.000173621	0.000935738	498	501
HMCN1	0.269319	8.97342e-10	1.91297e-08	498	501
HMGB2	-0.204823	3.79702e-06	3.44456e-05	498	501
HMGCLL1	0.272534	5.55079e-10	1.23711e-08	498	458
HMGCL	0.231448	1.61574e-07	2.09828e-06	498	501
HMOX1	0.229031	2.18761e-07	2.73152e-06	498	501
HMX1	-0.204876	3.77477e-06	3.42747e-05	498	278
HMX2	-0.227187	2.75037e-07	3.36318e-06	498	340
HNF1B	0.700241	4.7165e-75	3.05857e-72	498	452
HNF4A	0.22668	2.9283e-07	3.54837e-06	498	434
HNMT	0.364909	3.16948e-17	1.79989e-15	498	501
HNRNPA0	-0.209548	2.23172e-06	2.15609e-05	498	501
HNRNPA1L2	-0.190697	1.72961e-05	0.00012637	498	501
HNRNPA1	-0.176593	7.06521e-05	0.0004291	498	501
HNRNPA2B1	-0.194974	1.10534e-05	8.57278e-05	498	501
HNRNPAB	-0.176123	7.39084e-05	0.000447255	498	501
HNRNPD	-0.197177	8.74372e-06	7.01137e-05	498	501
HNRNPH1	-0.200454	6.13918e-06	5.16385e-05	498	501
HNRNPH3	-0.244433	2.99456e-08	4.60594e-07	498	501
HNRNPK	-0.180566	4.80368e-05	0.000304824	498	501
HNRNPM	-0.184068	3.3954e-05	0.000226695	498	501
HNRNPR	-0.186211	2.73725e-05	0.000188384	498	501
HNRNPU	-0.234713	1.06725e-07	1.45555e-06	498	501
HOPX	0.491788	7.18441e-32	1.06984e-29	498	501
HOTAIR	-0.250518	1.314e-08	2.19215e-07	498	401
HOXA11AS	-0.167777	0.000161457	0.000880328	498	467
HOXB8	-0.192051	1.50259e-05	0.000111917	498	486
HOXB9	-0.188827	2.09713e-05	0.000149129	498	480
HOXC10	-0.186028	2.78846e-05	0.000191581	498	469
HOXC11	-0.167798	0.000161145	0.000878867	498	432
HOXC4	-0.22771	2.57786e-07	3.16572e-06	498	501
HOXC5	-0.269891	8.24154e-10	1.77197e-08	498	493
HOXC6	-0.263793	2.01895e-09	3.97912e-08	498	501
HOXC8	-0.210579	1.98403e-06	1.94182e-05	498	494
HOXC9	-0.250297	1.3544e-08	2.25207e-07	498	494
HOXD10	-0.193156	1.33863e-05	0.000101358	498	494
HOXD12	-0.174561	8.57867e-05	0.000510832	498	280
HOXD13	-0.168833	0.000146544	0.000809338	498	449
HOXD1	0.225317	3.46251e-07	4.11874e-06	498	501
HOXD9	-0.269645	8.54932e-10	1.82643e-08	498	501
HPGDS	0.336646	9.67262e-15	4.35983e-13	498	499
HPGD	0.349076	8.38646e-16	4.31184e-14	498	501
HPN	0.448245	3.92286e-26	4.30936e-24	498	496
HPR	0.717642	1.93269e-80	1.49434e-77	498	384
HP	1	1e-120	1e-116	498	498
HRH1	0.194583	1.15204e-05	8.88018e-05	498	501
HRNBP3	-0.169003	0.000144281	0.000799029	498	449
HS3ST1	0.241541	4.39571e-08	6.47377e-07	498	501
HS3ST2	0.345859	1.5959e-15	7.96091e-14	498	499
HSBP1L1	0.179086	5.55162e-05	0.000346113	498	501
HSD11B1	0.34979	7.26323e-16	3.74392e-14	498	501
HSD17B11	0.303528	3.88404e-12	1.20681e-10	498	501
HSD17B2	0.167352	0.000167844	0.000908991	498	493
HSD17B4	0.374515	3.96724e-18	2.42412e-16	498	501
HSD17B6	0.427318	1.17608e-23	1.08453e-21	498	501
HSD3B2	0.254145	7.95905e-09	1.37458e-07	498	262
HSD3B7	0.16693	0.000174429	0.000939591	498	501
HSDL2	0.172827	0.00010106	0.000587851	498	501
HSP90AB1	-0.187093	2.50321e-05	0.000174306	498	501
HSPB6	0.317726	3.25302e-13	1.18256e-11	498	501
HSPB7	0.278177	2.35232e-10	5.56337e-09	498	501
HSPB8	0.234417	1.10839e-07	1.50351e-06	498	501
HTATSF1	-0.177442	6.51055e-05	0.000399516	498	501
HTR1B	-0.186083	2.77295e-05	0.000190645	498	396
HTR1F	0.176955	6.82354e-05	0.000416435	498	480
HTR3C	0.18651	2.65555e-05	0.000183641	498	285
HTRA4	0.226869	2.86051e-07	3.47672e-06	498	498
HYAL1	0.318129	3.0264e-13	1.10807e-11	498	501
HYAL2	0.324869	8.87956e-14	3.53477e-12	498	501
HYLS1	-0.189286	2.00065e-05	0.000143178	498	501
IBSP	-0.168599	0.000149733	0.000824906	498	489
ICAM1	0.363772	4.03453e-17	2.28468e-15	498	501
ICAM2	0.27158	6.40475e-10	1.41178e-08	498	501
ICAM3	0.21231	1.62639e-06	1.62906e-05	498	501
ICAM4	0.24947	1.51656e-08	2.50307e-07	498	501
IER3	0.20021	6.30406e-06	5.28484e-05	498	501
IFI30	0.256028	6.11638e-09	1.07952e-07	498	501
IFITM2	0.359445	1.00226e-16	5.4455e-15	498	501
IFITM3	0.217877	8.48573e-07	9.16158e-06	498	501
IFNAR1	0.187411	2.42343e-05	0.000169219	498	501
IFNAR2	0.223309	4.42401e-07	5.09369e-06	498	501
IFNGR1	0.29952	7.63759e-12	2.2848e-10	498	501
IFT57	0.2698	8.35466e-10	1.79246e-08	498	501
IGF1	0.330223	3.27967e-14	1.38974e-12	498	501
IGF2AS	-0.190395	1.78448e-05	0.000130023	498	347
IGF2BP3	-0.1869	2.55274e-05	0.000177386	498	501
IGF2	-0.209733	2.18511e-06	2.11902e-05	498	501
IGFALS	0.388201	1.81795e-19	1.23467e-17	498	482
IGFBP4	0.189631	1.93073e-05	0.000138818	498	501
IGFL2	0.182159	4.10566e-05	0.000266762	498	495
IGJ	0.342475	3.11489e-15	1.49806e-13	498	501
IGSF6	0.225921	3.21505e-07	3.85174e-06	498	501
IGSF9	-0.27504	3.80036e-10	8.68166e-09	498	501
IHH	0.418611	1.12531e-22	9.75087e-21	498	410
IKBIP	0.185949	2.81055e-05	0.000192966	498	501
IKZF1	0.19992	6.50601e-06	5.42024e-05	498	501
IL10RA	0.218873	7.53968e-07	8.2464e-06	498	501
IL10	0.221807	5.30601e-07	6.00601e-06	498	496
IL12B	0.17091	0.000120919	0.000686485	498	459
IL13RA1	0.242804	3.71924e-08	5.57138e-07	498	501
IL16	0.196068	9.84255e-06	7.77465e-05	498	501
IL18BP	0.178157	6.0756e-05	0.000375001	498	501
IL18RAP	0.196526	9.37298e-06	7.46829e-05	498	500
IL18	0.241356	4.50437e-08	6.61925e-07	498	501
IL1B	0.168448	0.000151822	0.000835958	498	501
IL1R1	0.380588	1.02841e-18	6.52181e-17	498	501
IL1RAP	0.170774	0.000122462	0.000693869	498	501
IL1RL1	0.397287	2.16487e-20	1.58256e-18	498	498
IL22RA1	-0.181566	4.35352e-05	0.000280509	498	500
IL22RA2	0.27552	3.53259e-10	8.12537e-09	498	492
IL2RA	0.18261	3.9263e-05	0.000256851	498	501
IL2RG	0.177678	6.36356e-05	0.000391692	498	501
IL33	0.495729	1.97396e-32	3.0292e-30	498	501
IL3RA	0.264201	1.90296e-09	3.77644e-08	498	501
IL4R	0.255468	6.61628e-09	1.15574e-07	498	501
IL5RA	0.261534	2.79751e-09	5.37139e-08	498	451
IL6R	0.250772	1.2689e-08	2.12043e-07	498	501
IL6ST	0.243741	3.28386e-08	4.97854e-07	498	501
IL6	0.242489	3.87794e-08	5.79184e-07	498	501
IL7R	0.229091	2.17114e-07	2.71603e-06	498	501
IL7	0.229427	2.08213e-07	2.62098e-06	498	501
IL8	0.264176	1.90983e-09	3.78633e-08	498	501
ILF3	-0.280833	1.55963e-10	3.7912e-09	498	501
ILK	0.189155	2.02772e-05	0.000144807	498	501
INCENP	-0.170427	0.000126476	0.000714601	498	501
INMT	0.441493	2.57986e-25	2.68719e-23	498	501
INPP4B	0.225378	3.43669e-07	4.09287e-06	498	501
INPP5D	0.202822	4.73764e-06	4.16991e-05	498	501
INPP5E	-0.244102	3.12973e-08	4.79042e-07	498	501
INSRR	-0.230212	1.88727e-07	2.41041e-06	498	381
INTS2	-0.209249	2.30885e-06	2.22187e-05	498	501
INTS3	-0.169543	0.000137263	0.000766714	498	501
INVS	-0.176719	6.97989e-05	0.000424559	498	501
IPCEF1	0.200183	6.32278e-06	5.2962e-05	498	501
IPO9	-0.181391	4.42936e-05	0.000284666	498	501
IQGAP2	0.21218	1.65101e-06	1.65074e-05	498	501
IQGAP3	-0.317297	3.51297e-13	1.26335e-11	498	501
IQUB	0.178928	5.63725e-05	0.000350962	498	490
IRAK2	0.182597	3.93115e-05	0.000257085	498	501
IRAK3	0.336125	1.06899e-14	4.78617e-13	498	501
IRF2BP1	-0.181997	4.17188e-05	0.000270452	498	501
IRF4	0.223796	4.16925e-07	4.82525e-06	498	501
IRF8	0.316717	3.89705e-13	1.38992e-11	498	501
IRS1	0.183857	3.46779e-05	0.000230914	498	501
ISL2	-0.189296	1.99855e-05	0.00014308	498	495
ISYNA1	-0.187827	2.32279e-05	0.000163269	498	501
ITGA1	0.195009	1.10124e-05	8.54429e-05	498	501
ITGA3	0.208296	2.57205e-06	2.45052e-05	498	501
ITGA4	0.211675	1.74982e-06	1.73711e-05	498	501
ITGA8	0.253277	8.97978e-09	1.53897e-07	498	493
ITGA9	0.191901	1.52633e-05	0.000113377	498	501
ITGAD	0.172906	0.000100319	0.000584266	498	459
ITGAL	0.179478	5.34323e-05	0.000335253	498	501
ITGAM	0.208415	2.53791e-06	2.42258e-05	498	501
ITGAX	0.260371	3.30517e-09	6.21552e-08	498	501
ITGB2	0.246823	2.17224e-08	3.463e-07	498	501
ITGB3	0.192981	1.36341e-05	0.000102847	498	501
ITGB6	0.371562	7.57002e-18	4.52917e-16	498	500
ITGB7	0.193425	1.30148e-05	9.90294e-05	498	501
ITIH2	0.543988	6.257e-40	1.42937e-37	498	404
ITIH3	0.32358	1.1252e-13	4.40935e-12	498	490
ITK	0.188268	2.22061e-05	0.0001568	498	501
ITLN1	0.310635	1.14135e-12	3.81139e-11	498	414
ITM2A	0.313298	7.1523e-13	2.477e-11	498	501
ITPKC	0.19638	9.52015e-06	7.5534e-05	498	501
ITPR1	0.311086	1.05481e-12	3.54596e-11	498	501
IYD	0.267629	1.15213e-09	2.38777e-08	498	465
JAK1	0.236218	8.7975e-08	1.22223e-06	498	501
JAM2	0.268389	1.02982e-09	2.16094e-08	498	501
JPH3	-0.198862	7.29554e-06	5.98866e-05	498	493
KAL1	0.1925	1.43384e-05	0.000107514	498	501
KANK3	0.295763	1.42588e-11	4.08325e-10	498	501
KAT2A	-0.276952	2.83893e-10	6.57501e-09	498	501
KAT2B	0.20695	2.9935e-06	2.79769e-05	498	501
KBTBD11	0.178083	6.1195e-05	0.000377363	498	501
KBTBD12	0.259036	3.99844e-09	7.3407e-08	498	443
KBTBD8	0.203165	4.56203e-06	4.03532e-05	498	501
KCNA3	0.277154	2.75252e-10	6.41925e-09	498	498
KCNA5	0.179427	5.36989e-05	0.000336505	498	469
KCNE1	0.204616	3.8851e-06	3.51145e-05	498	498
KCNG2	0.18401	3.41535e-05	0.000227951	498	421
KCNIP1	0.199899	6.52126e-06	5.42844e-05	498	442
KCNJ15	0.337814	7.72261e-15	3.52836e-13	498	501
KCNJ4	-0.183718	3.51617e-05	0.000233671	498	378
KCNJ5	0.230517	1.81644e-07	2.32881e-06	498	501
KCNJ8	0.408736	1.34745e-21	1.04586e-19	498	501
KCNK17	0.425561	1.86524e-23	1.68905e-21	498	499
KCNK3	0.512862	5.87983e-35	9.60994e-33	498	499
KCNK5	0.397521	2.04726e-20	1.50755e-18	498	501
KCNMB3	-0.232291	1.45244e-07	1.90466e-06	498	501
KCNN1	-0.181981	4.17877e-05	0.000270812	498	496
KCNN2	0.345987	1.55592e-15	7.78074e-14	498	499
KCNQ1	0.452257	1.25525e-26	1.40973e-24	498	501
KCNQ3	0.392132	7.29896e-20	5.11258e-18	498	491
KCNT2	0.20093	5.82931e-06	4.94459e-05	498	499
KCTD10	0.168004	0.000158138	0.000865283	498	501
KCTD12	0.237227	7.72325e-08	1.08422e-06	498	501
KCTD14	0.241738	4.28299e-08	6.33094e-07	498	501
KCTD16	0.235022	1.02579e-07	1.40282e-06	498	493
KCTD3	-0.218218	8.15062e-07	8.84729e-06	498	501
KDELC1	-0.176988	6.80138e-05	0.000415335	498	501
KDM2B	-0.25601	6.13179e-09	1.08129e-07	498	501
KDM3B	-0.179307	5.43336e-05	0.000339847	498	501
KDR	0.19612	9.78775e-06	7.7344e-05	498	501
KEAP1	-0.193044	1.35452e-05	0.000102406	498	501
KHDRBS1	-0.178252	6.02004e-05	0.000372143	498	501
KHDRBS2	0.346707	1.34794e-15	6.80846e-14	498	373
KHK	-0.190351	1.79265e-05	0.000130511	498	501
KHSRP	-0.193954	1.23097e-05	9.43071e-05	498	501
KIAA0125	0.243182	3.53754e-08	5.31504e-07	498	498
KIAA0319L	0.2769	2.86168e-10	6.62006e-09	498	501
KIAA0408	0.474492	1.71509e-29	2.2535e-27	498	297
KIAA0494	0.208755	2.44196e-06	2.34212e-05	498	501
KIAA0513	0.207903	2.68892e-06	2.54378e-05	498	501
KIAA0748	0.246943	2.13733e-08	3.41548e-07	498	501
KIAA0892	-0.210761	1.94309e-06	1.90732e-05	498	501
KIAA0907	-0.265166	1.6533e-09	3.32696e-08	498	501
KIAA1009	-0.179188	5.49659e-05	0.000343374	498	501
KIAA1267	-0.221458	5.53349e-07	6.23541e-06	498	501
KIAA1370	0.181197	4.51463e-05	0.000289129	498	501
KIAA1486	0.173293	9.67197e-05	0.000567695	498	406
KIAA1549	-0.171686	0.000112479	0.00064605	498	501
KIAA1731	-0.195232	1.07561e-05	8.38423e-05	498	501
KIAA1908	0.171621	0.000113165	0.000649616	498	501
KIF11	-0.316677	3.92519e-13	1.39661e-11	498	501
KIF12	0.179713	5.22197e-05	0.000327952	498	486
KIF13B	0.196341	9.55982e-06	7.57812e-05	498	501
KIF14	-0.280103	1.74688e-10	4.21074e-09	498	501
KIF15	-0.282015	1.29726e-10	3.19986e-09	498	501
KIF18B	-0.307458	1.98143e-12	6.435e-11	498	501
KIF1A	-0.229468	2.0715e-07	2.61088e-06	498	488
KIF1C	0.216268	1.02599e-06	1.081e-05	498	501
KIF20A	-0.217307	9.07761e-07	9.72228e-06	498	501
KIF20B	-0.246412	2.29608e-08	3.63613e-07	498	501
KIF22	-0.265669	1.53622e-09	3.10691e-08	498	501
KIF23	-0.1947	1.13783e-05	8.79761e-05	498	501
KIF24	-0.202065	5.14875e-06	4.45759e-05	498	501
KIF2C	-0.174521	8.61126e-05	0.000512201	498	501
KIF3C	-0.216434	1.00615e-06	1.06222e-05	498	501
KIF4A	-0.242964	3.64106e-08	5.46241e-07	498	501
KIF4B	-0.266857	1.29085e-09	2.64526e-08	498	501
KIF5A	-0.205107	3.67869e-06	3.35235e-05	498	483
KIF5C	-0.232688	1.38117e-07	1.82189e-06	498	501
KIFC1	-0.259205	3.9037e-09	7.20174e-08	498	501
KIFC2	-0.180849	4.67209e-05	0.000297602	498	501
KITLG	0.316085	4.36307e-13	1.54149e-11	498	501
KLB	0.217913	8.44977e-07	9.12766e-06	498	492
KLC2	-0.185089	3.06495e-05	0.000208017	498	501
KLF10	0.23758	7.37776e-08	1.03862e-06	498	501
KLF15	0.234471	1.10069e-07	1.4961e-06	498	501
KLF17	0.284991	8.12532e-11	2.08346e-09	498	431
KLF2	0.198465	7.61462e-06	6.21253e-05	498	501
KLHDC7A	0.436002	1.15735e-24	1.1405e-22	498	482
KLHL15	-0.182667	3.90406e-05	0.00025548	498	501
KLHL2	0.255467	6.61718e-09	1.15574e-07	498	501
KLHL31	-0.215407	1.135e-06	1.181e-05	498	499
KLHL4	0.197767	8.20802e-06	6.63474e-05	498	495
KLHL6	0.20159	5.42349e-06	4.65622e-05	498	501
KLRB1	0.296389	1.28585e-11	3.70335e-10	498	497
KL	0.26084	3.09064e-09	5.86696e-08	498	500
KMO	0.311136	1.04574e-12	3.52136e-11	498	501
KNDC1	0.527129	3.5794e-37	7.34252e-35	498	495
KNTC1	-0.297296	1.10641e-11	3.24228e-10	498	501
KPNA2	-0.18257	3.942e-05	0.000257627	498	501
KPNA7	0.179033	5.58032e-05	0.000347741	498	469
KPNB1	-0.182465	3.98307e-05	0.000259973	498	501
KRBA1	-0.186486	2.66198e-05	0.000184023	498	501
KRI1	-0.201419	5.526e-06	4.72318e-05	498	501
KRT27	0.195083	1.09274e-05	8.48812e-05	498	305
KRT77	-0.17538	7.93502e-05	0.000476752	498	425
KRT7	0.425832	1.73724e-23	1.58026e-21	498	501
KRTAP5-6	-0.170364	0.000127214	0.000717961	498	143
LACTB	0.197107	8.80915e-06	7.05539e-05	498	501
LAIR1	0.287531	5.42636e-11	1.43534e-09	498	501
LAMA2	0.215715	1.09475e-06	1.14504e-05	498	501
LAMC3	0.262887	2.30212e-09	4.48879e-08	498	501
LAMP3	0.380438	1.06366e-18	6.72415e-17	498	501
LAP3	0.197049	8.86442e-06	7.09683e-05	498	501
LAPTM5	0.283498	1.02823e-10	2.57417e-09	498	501
LARS	-0.2123	1.62825e-06	1.63012e-05	498	501
LAS1L	-0.196939	8.96861e-06	7.1675e-05	498	501
LASS1	-0.203992	4.16351e-06	3.72658e-05	498	492
LAT2	0.259414	3.78898e-09	7.03972e-08	498	501
LAX1	0.240926	4.76651e-08	6.95869e-07	498	501
LBP	0.48502	6.35413e-31	8.93266e-29	498	415
LBR	-0.182962	3.79134e-05	0.000248913	498	501
LCLAT1	-0.168596	0.000149776	0.000824915	498	501
LCN10	0.229369	2.09728e-07	2.63675e-06	498	469
LCN2	0.229048	2.18289e-07	2.72733e-06	498	501
LCN6	0.171261	0.000117029	0.00066779	498	147
LCP1	0.205044	3.70488e-06	3.37315e-05	498	501
LCP2	0.201855	5.26857e-06	4.53593e-05	498	501
LDB2	0.326033	7.16277e-14	2.86839e-12	498	501
LDLRAD1	0.210604	1.97847e-06	1.93732e-05	498	370
LDLRAP1	0.175599	7.77107e-05	0.000468291	498	501
LECT1	-0.170155	0.000129704	0.000730783	498	252
LEFTY2	0.25804	4.60559e-09	8.37126e-08	498	446
LENEP	-0.180111	5.02289e-05	0.000317233	498	326
LEPREL1	0.176014	7.46847e-05	0.000451545	498	501
LEPROT	0.277862	2.46893e-10	5.81862e-09	498	501
LEPR	0.23515	1.00911e-07	1.38378e-06	498	501
LGALS12	0.222465	4.90062e-07	5.59757e-06	498	442
LGALS2	0.176621	7.04577e-05	0.000428048	498	492
LGALS3	0.215903	1.07086e-06	1.12298e-05	498	501
LGI2	0.205987	3.33486e-06	3.08517e-05	498	501
LGI3	0.181382	4.43341e-05	0.000284793	498	494
LGMN	0.260156	3.40854e-09	6.39197e-08	498	501
LHFPL2	0.218869	7.54371e-07	8.2464e-06	498	501
LHFPL3	0.208167	2.60998e-06	2.48078e-05	498	409
LHX2	-0.213701	1.3847e-06	1.41375e-05	498	489
LHX4	-0.170042	0.000131078	0.000736574	498	496
LHX9	0.195256	1.07286e-05	8.36927e-05	498	433
LIF	0.308595	1.62775e-12	5.33811e-11	498	501
LIG1	-0.227863	2.52959e-07	3.11023e-06	498	501
LIG3	-0.217034	9.37476e-07	9.99262e-06	498	501
LILRA1	0.34584	1.60182e-15	7.97064e-14	498	486
LILRA2	0.322201	1.44803e-13	5.5659e-12	498	500
LILRA4	0.291245	2.98494e-11	8.15302e-10	498	484
LILRA5	0.372474	6.20461e-18	3.73447e-16	498	501
LILRA6	0.271747	6.24633e-10	1.38141e-08	498	500
LILRB1	0.234497	1.09711e-07	1.49224e-06	498	501
LILRB2	0.213621	1.3976e-06	1.42187e-05	498	501
LILRB3	0.308186	1.74734e-12	5.71166e-11	498	501
LILRB4	0.202804	4.74703e-06	4.17545e-05	498	501
LILRB5	0.201454	5.50517e-06	4.71183e-05	498	501
LIMCH1	0.327374	5.58505e-14	2.26363e-12	498	501
LIMD1	0.219289	7.17545e-07	7.88241e-06	498	501
LIN54	-0.179729	5.21405e-05	0.000327556	498	501
LIN9	-0.241151	4.6271e-08	6.77977e-07	498	501
LINGO1	-0.271942	6.06628e-10	1.34307e-08	498	501
LINGO4	0.400607	9.78461e-21	7.28518e-19	498	390
LIPA	0.23906	6.08617e-08	8.72684e-07	498	501
LIPG	0.221613	5.43135e-07	6.13407e-06	498	501
LIPH	0.246968	2.13027e-08	3.4069e-07	498	501
LITAF	0.247047	2.10765e-08	3.38149e-07	498	501
LMBRD1	0.212698	1.55517e-06	1.56709e-05	498	501
LMCD1	0.189389	1.97959e-05	0.000141874	498	501
LMNB1	-0.230006	1.93654e-07	2.46239e-06	498	501
LMNB2	-0.218571	7.81531e-07	8.52475e-06	498	501
LMO3	0.650778	1.13572e-61	5.43606e-59	498	499
LMO7	0.200022	6.43464e-06	5.37637e-05	498	501
LMOD1	0.184432	3.27413e-05	0.000219839	498	501
LMOD3	0.202839	4.7289e-06	4.16586e-05	498	474
LMX1B	-0.252847	9.53239e-09	1.62674e-07	498	469
LNX2	0.171298	0.000116626	0.00066587	498	501
LOC100126784	0.206304	3.21854e-06	2.98718e-05	498	491
LOC100128191	-0.279948	1.78929e-10	4.30265e-09	498	501
LOC100128640	-0.169835	0.000133605	0.000749405	498	501
LOC100129034	0.193531	1.287e-05	9.80763e-05	498	501
LOC100129726	-0.196866	9.03885e-06	7.21923e-05	498	496
LOC100130933	0.464546	3.48035e-28	4.31885e-26	498	450
LOC100132354	-0.180524	4.82337e-05	0.000305846	498	446
LOC100188949	0.172895	0.000100419	0.000584631	498	495
LOC100192378	-0.170878	0.000121288	0.000688187	498	222
LOC100216545	-0.209715	2.18958e-06	2.12233e-05	498	501
LOC100233209	0.195119	1.08859e-05	8.46249e-05	498	501
LOC100270804	-0.186261	2.72342e-05	0.000187625	498	501
LOC100271832	-0.179752	5.20237e-05	0.000326925	498	233
LOC100286844	-0.187773	2.33563e-05	0.000164114	498	501
LOC100287718	0.243711	3.297e-08	4.98994e-07	498	236
LOC115110	0.200681	5.98944e-06	5.04846e-05	498	501
LOC144486	-0.185857	2.83697e-05	0.000194581	498	500
LOC147727	-0.219445	7.04373e-07	7.75466e-06	498	501
LOC149134	-0.216866	9.56227e-07	1.01602e-05	498	495
LOC149620	0.384305	4.43781e-19	2.96389e-17	498	193
LOC149837	0.192101	1.49486e-05	0.000111425	498	501
LOC150622	0.265637	1.54341e-09	3.11832e-08	498	263
LOC152024	-0.178744	5.73915e-05	0.000356423	498	400
LOC154822	0.249226	1.568e-08	2.5795e-07	498	417
LOC158376	0.313425	6.99303e-13	2.42799e-11	498	500
LOC200030	-0.198933	7.23975e-06	5.95015e-05	498	501
[truncated: 1,765 more rows]
